# Supplementary material for: Well-regulated structure-featuring giant-molecule acceptors enable long-term stability and high-performance binary organic solar cells
Source: Royal Society of Chemistry journal article supplement (doi:10.1039/d4ee03754e), 2024-01-01
Supplement: d4ee03754e1.pdf [file d4ee03754e1.pdf]

## Supplemental information

Well-regulated Structures Featured Giant-molecule Acceptors Enable Long-term  
Stability and High-Performance Binary Organic Solar Cells

*Jingyu Shi<sup>1,2</sup>, Pengfei Ding<sup>1,2</sup>, Jintao Zhu<sup>3</sup>, Zhenyu Chen<sup>1,2</sup>, Shuangjiao Gao<sup>1</sup>, Xueliang  
Yu<sup>1</sup>, Xiaochun Liao<sup>1,2</sup>, Quan Liu<sup>1</sup>, Ziyi Ge<sup>1,2,\*</sup>*

## 1. Materials

PM6 was purchased from Solarmer Energy Inc.

4,7-dibromo-5,6-dinitrobenzo[c][1,2,5]thiadiazole, tributyl(6-octylselenopheno [3,2-b]thiophen-2-yl) stannane, tributyl(6-octylthieno[3,2-b]thiophen-2-yl)stannane, 1-Bromo-3-octyldodecane, 2-(5-bromo-3-oxo-2,3-dihydro-1H-inden-1-ylidene) malononitrile, 2,5-bis-trimethylstannyl-thiophene, 2,5-bis-trimethylstannyl-selenophen and 2-(5,6-difluoro-3-oxo-2,3-dihydro-1H-inden-1-ylidene) malononitrile were purchased from Nanjing Zhiyan Technology Co., Ltd.

The ITO glass was purchased from Suzhou Shangyang Solar Technology Co., Ltd. All reagents were directly used without any further treatment, and all the reactions were carried out under a nitrogen atmosphere.

## 2. The synthetic routes of four GMAs, GMA-SSS, GMA-SSeS, GMA-SeSSe and GMA-SeSeSe.

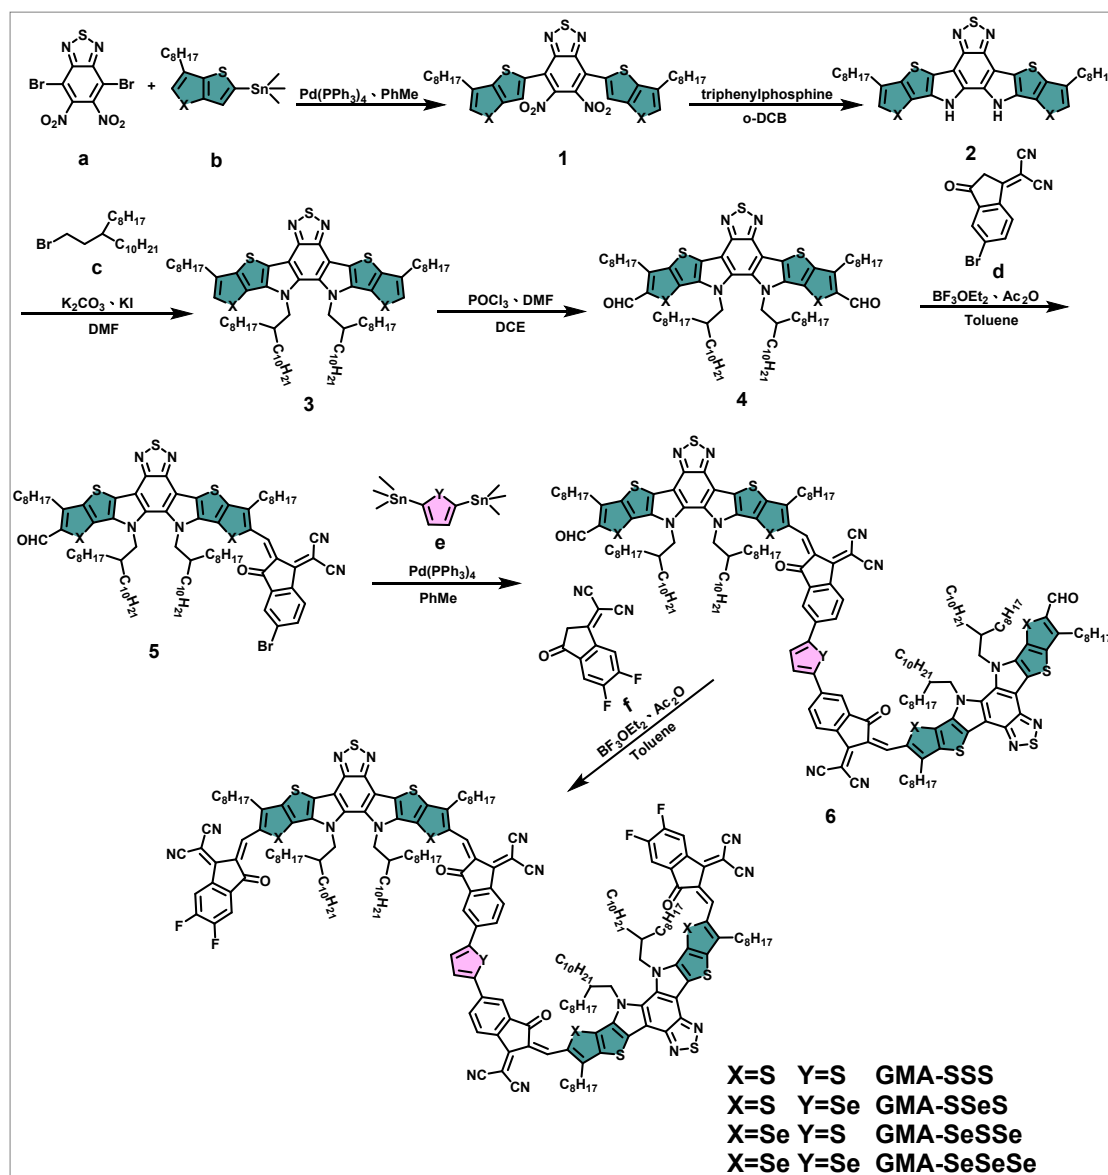

**Figure S1.** Synthetic routes of four GMAs.

**Synthesis of compound 1 (X=Se),** Compound **a** (4,7-dibromo-5,6-dinitrobenzo[*c*] [1,2,5]thiadiazole) (1.54 g, 4.00 mmol), compound **b** (tributyl(6-octylselenopheno [3,2-*b*] thiophen-2-yl) stannane) (5.88 g, 10.00 mmol) and Pd(PPh<sub>3</sub>)<sub>4</sub> (0.23 g, 0.2 mmol) were dissolved in toluene (30 ml) and stirred at 110 °C for 5 h under nitrogen atmosphere. The solvent was removed under vacuum after the reaction mixture was cooled to ambient temperature. Compound **1** (X=Se) were purified by chromatography in a silica gel column eluting with petroleum ether/dichloromethane (5/1, v/v), which yielding a red powder as product **1** (X=Se) (2.26 g, 80% yield).

$^1\text{H}$  NMR ( $\text{CDCl}_3$ ): 7.75 (s, 2H), 7.71 (s, 2H), 2.75 (t,  $J=7.7$  Hz, 4H), 1.84-1.74 (m, 4H), 1.42-1.26 (m, 20H), 0.92-0.86 (m, 6H).

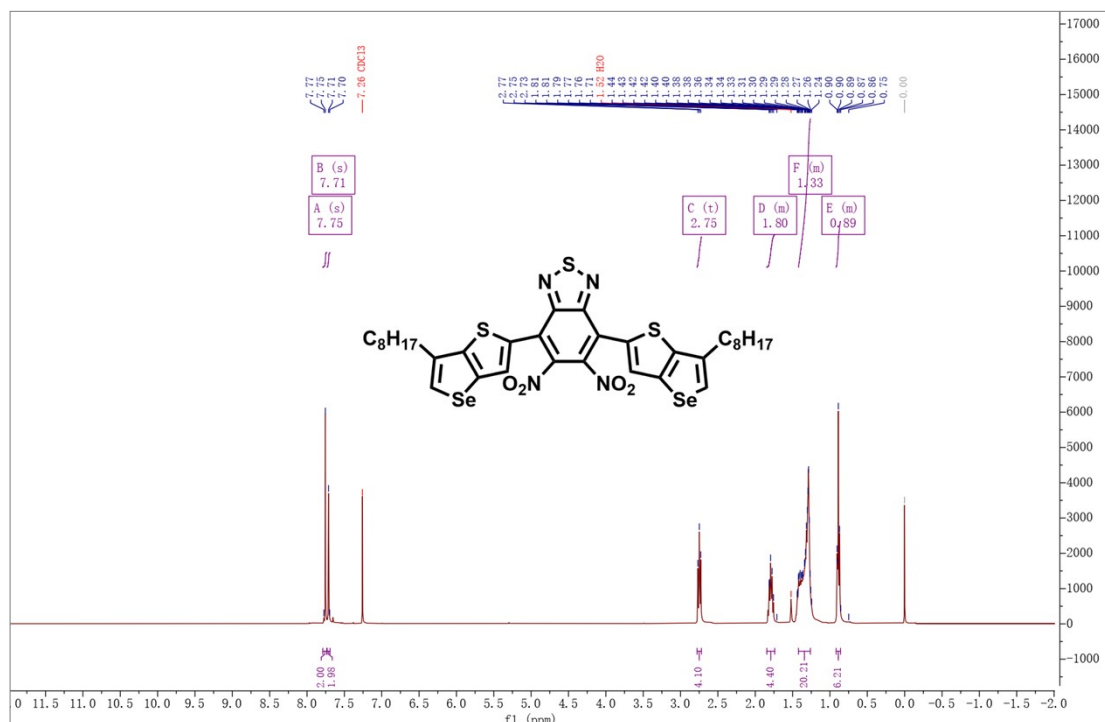

**Figure S2.**  $^1\text{H}$ -NMR spectrum of compound 1 (X=Se).

**Synthesis of compound 3 (X=Se),** under nitrogen, compound 1 (X=Se) (2.63 g, 3.20 mmol) and triphenylphosphine (9.03 g, 32.00 mmol) were dissolved in 1,2-dichlorobenzene (*o*-DCB, 35 ml). The mixture was stirred at 185 °C for 40 h. After cooled to ambient temperature, the solvent was removed under reduced pressure, which produced a red solid. The red intermediate 2 (X=Se) was firstly washed with petroleum ether by column chromatography in a silica gel column, then washed with ethyl acetate. Compound 2 (X=Se) (2.27 g, 3.00 mmol), compound c (1-Bromo-3-octyldodecane (5.50 g, 18.00 mmol)),  $\text{K}_2\text{CO}_3$  (4.15 g, 30.00 mmol), KI (0.25 g, 1.50 mmol) and DMF (30 ml) were added into a three-necked round bottom flask. The mixture was deoxygenated with nitrogen for 3 min. The mixture was refluxed at 85 °C for 10 h. After removing the solvent from the filtrate, the residue was extracted with dichloromethane and  $\text{H}_2\text{O}$ . The mixture was purified with column chromatography on silica gel using petroleum ether/dichloromethane (3/1, v/v) as the eluent to give an orange solid 3 (X=Se) (1.38 g, 35% yield).

$^1\text{H}$  NMR ( $\text{CDCl}_3$ ): 7.53 (s, 2H), 4.55 (d,  $J=7.8$  Hz, 4H), 2.79 (t,  $J=7.8$  Hz, 4H), 2.08 (p,

$J=6.7$  Hz, 2H), 1.86 (p,  $J=7.6$  Hz, 4H), 1.47 (dt,  $J=12.0, 6.8$  Hz, 4H), 1.32 (tdd,  $J=24.6, 12.2, 6.5$  Hz, 22H), 1.18 (dt,  $J=13.9, 7.0$  Hz, 12H), 1.10-0.92 (m, 30H), 0.85 (dt,  $J=20.9, 7.0$  Hz, 28H), 0.75-0.62 (m, 6H).

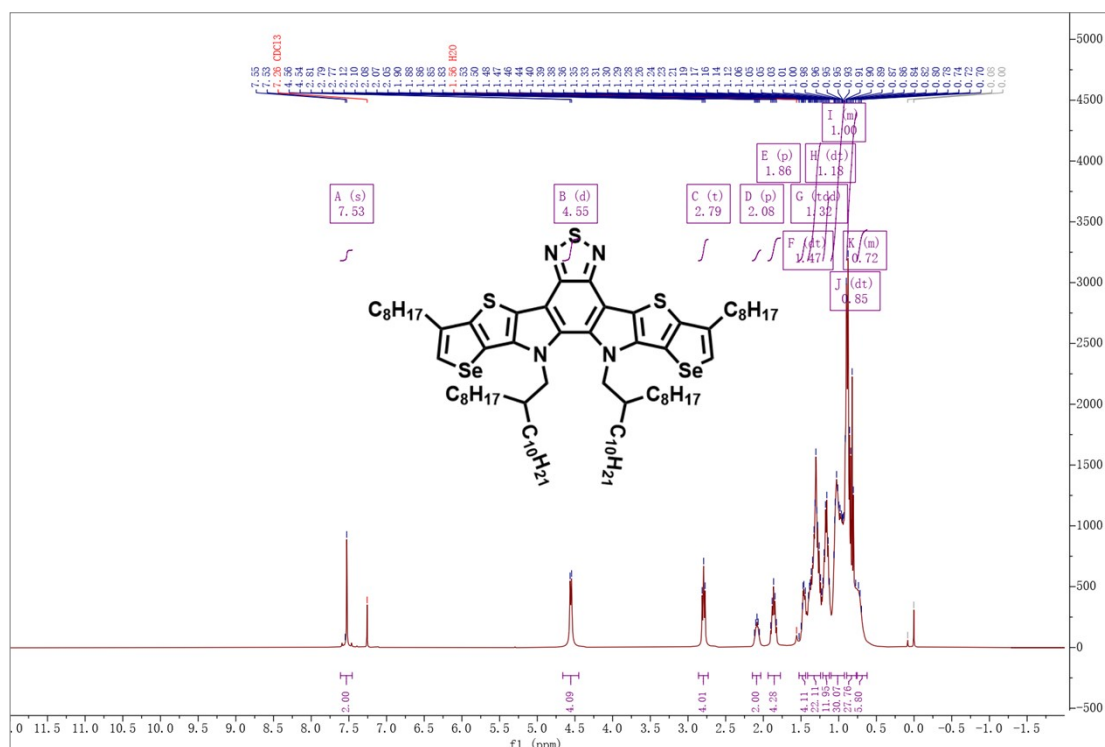

**Figure S3.**  $^1\text{H}$ -NMR spectrum of compound **3** ( $\text{X}=\text{Se}$ ).

**Synthesis of compound 4 ( $\text{X}=\text{S}$ ),** a solution of compound **3** ( $\text{X}=\text{S}$ ) (1.29 g, 1.05 mmol) in 1,2-dichloroethane (DCE, 30 ml) was added in a three-neck flask under nitrogen. The anhydrous DMF (0.8 ml) and phosphorus oxychloride (0.8 ml) was added at  $0^\circ\text{C}$  (icy water bathing), the mixture was then stirred for 2 h. After withdrew the ice bath, the mixture was heated to  $85^\circ\text{C}$  and reacted overnight. The mixture was poured into saturated sodium carbonate aqueous solution (300 ml) to quench the reaction and extracted with dichloromethane several times. Removing the solvent and the crude product was purified by column chromatography in a silica gel column, eluting with petroleum ether/dichloromethane (2/1, v/v) to give compound **4** ( $\text{X}=\text{S}$ ) (orange solid, 1.21 g, 90% yield).

$^1\text{H}$  NMR ( $\text{CDCl}_3$ ): 10.14 (s, 2H), 4.62 (d,  $J=7.8$  Hz, 4H), 3.19 (t,  $J=7.8$  Hz, 4H), 2.04 (q,  $J=6.3$  Hz, 2H), 1.91 (q,  $J=7.7$  Hz, 4H), 1.50-1.44 (m, 4H), 1.38 (q,  $J=5.0, 3.1$  Hz, 4H), 1.36-1.24 (m, 18H), 1.23-1.09 (m, 16H), 1.08-0.90 (m, 36H), 0.88 (d,  $J=1.6$  Hz, 4H), 0.82 (d,  $J=7.1$  Hz, 6H), 0.79 (s, 4H).

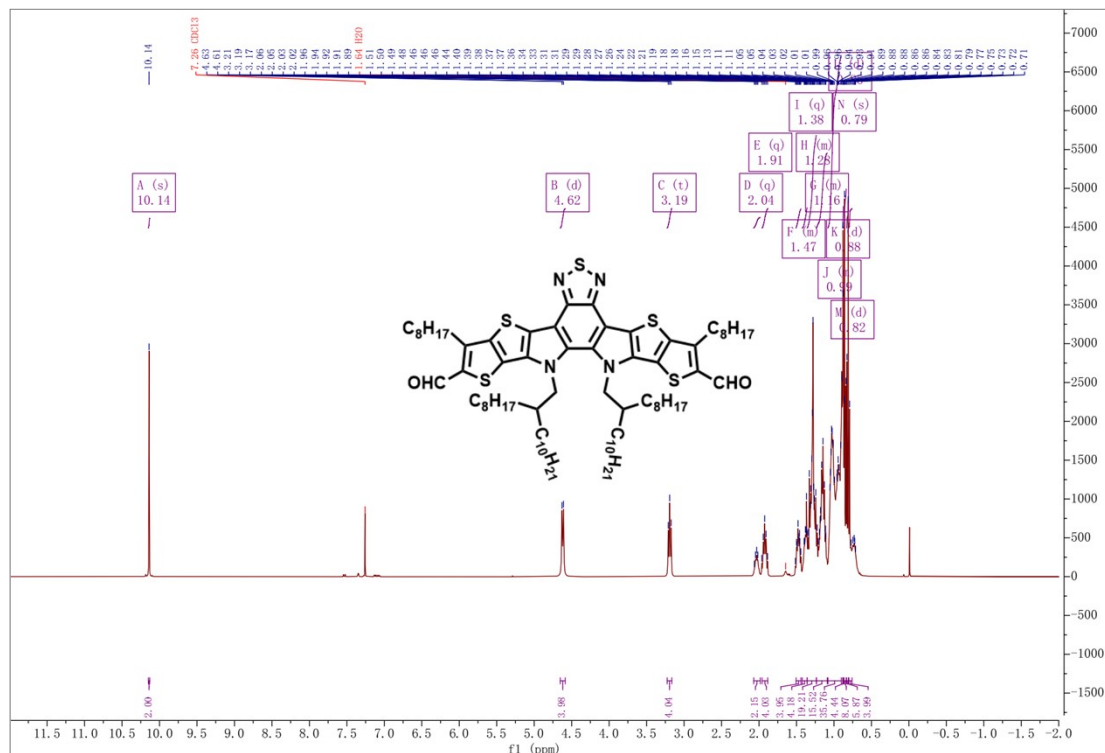

**Figure S4.**  $^1\text{H}$ -NMR spectrum of compound **4** (X=S).

**Synthesis of compound 4 (X=Se),** a solution of compound **3** (X=Se) (1.38 g, 1.05 mmol) in 1,2-dichloroethane (DCE, 30 ml) was added in a three-neck flask under nitrogen. The anhydrous DMF (0.8 ml) and phosphorus oxychloride (0.8 ml) was added at 0 °C (icy water bathing), the mixture was then stirred for 2 h. After withdrew the ice bath, the mixture was heated to 85 °C and reacted overnight. The mixture was poured into saturated sodium carbonate aqueous solution (300 ml) to quench the reaction and extracted with dichloromethane several times. Removing the solvent and the crude product was purified by column chromatography in a silica gel column, eluting with petroleum ether/dichloromethane (2/1, v/v) to give compound **4** (X=Se) (orange solid, 1.30 g, 90% yield).

$^1\text{H}$  NMR ( $\text{CDCl}_3$ ): 10.04 (s, 2H), 4.59 (d,  $J=7.7$  Hz, 4H), 3.18 (t,  $J=7.8$  Hz, 4H), 2.03 (q,  $J=6.4$  Hz, 2H), 1.94 (q,  $J=7.6$  Hz, 4H), 1.48 (q,  $J=7.8$  Hz, 4H), 1.38 (q,  $J=5.4, 3.7$  Hz, 4H), 1.32-1.20 (m, 18H), 1.15 (p,  $J=6.5$  Hz, 12H), 1.06-0.91 (m, 30H), 0.90-0.81 (m, 28H), 0.78-0.66 (m, 6H).

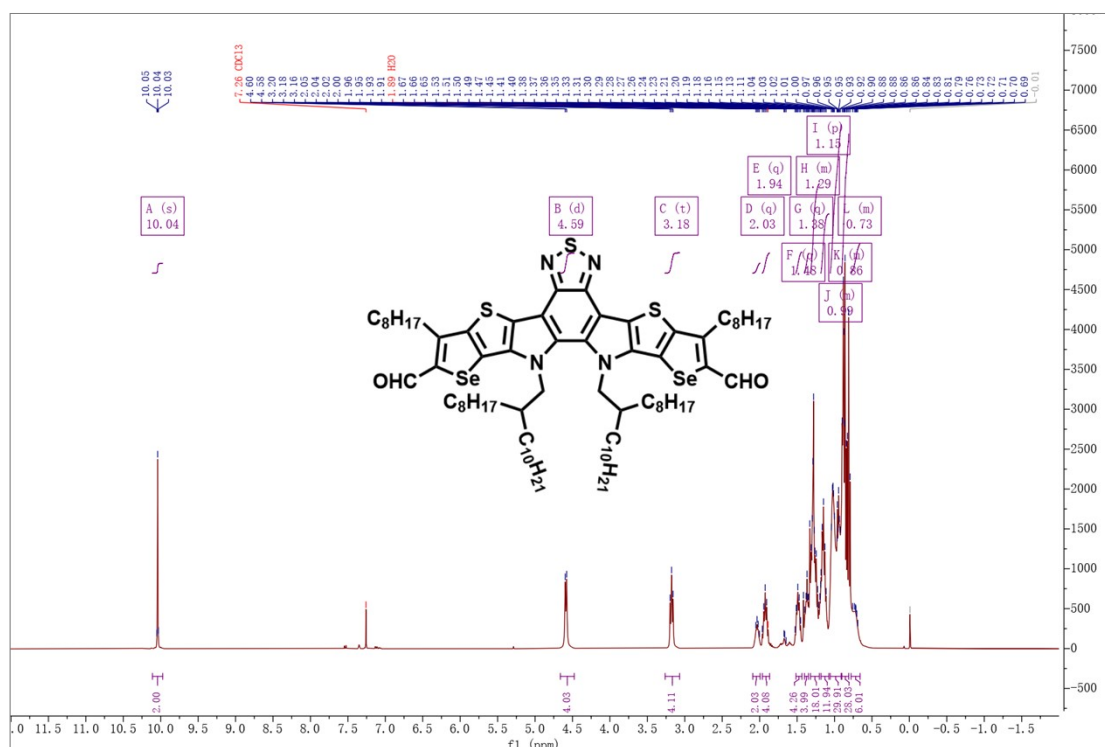

**Figure S5.**  $^1\text{H}$ -NMR spectrum of compound **4** (X=Se).

**Synthesis of compound 5 (X=S),** under nitrogen, compound **4** (X=S) (1.21 g, 0.95 mmol), compound **d** 2-(5-bromo-3-oxo-2,3-dihydro-1H-inden-1-ylidene) malononitrile (0.26 g, 0.95 mmol),  $\text{BF}_3\text{OEt}_2$  (0.80 ml), acetic anhydride  $\text{Ac}_2\text{O}$  (1.00 ml) and toluene (15 ml) were added to a 50 ml round-bottled flask. After the reaction performed at  $60^\circ\text{C}$  for 30 minutes, the mixture was poured into methanol and filtered. The residue was purified in a silica gel column using petroleum ether/chloroform (1.5/1, v/v) as the eluent. Compound **5** (X=S) was obtained as a green solid (0.87 g, 60% yield).

$^1\text{H}$  NMR ( $\text{CDCl}_3$ ): 10.16 (s, 1H), 9.12 (s, 1H), 8.50 (d,  $J=8.4$  Hz, 1H), 8.00 (s, 1H), 7.79 (d,  $J=8.5$  Hz, 1H), 4.71 (dd,  $J=32.2, 7.7$  Hz, 4H), 3.19 (dt,  $J=14.5, 7.8$  Hz, 4H), 2.10 (h,  $J=6.7$  Hz, 2H), 1.97-1.82 (m, 4H), 1.49 (h,  $J=7.4, 6.1$  Hz, 4H), 1.38 (d,  $J=9.9$  Hz, 4H), 1.29 (h,  $J=7.8, 7.2$  Hz, 20H), 1.18-1.09 (m, 16H), 1.07-0.92 (m, 36H), 0.89 (s, 4H), 0.86 (dd,  $J=6.7, 3.8$  Hz, 8H), 0.81 (d,  $J=2.6$  Hz, 4H), 0.78 (d,  $J=7.5$  Hz, 6H).

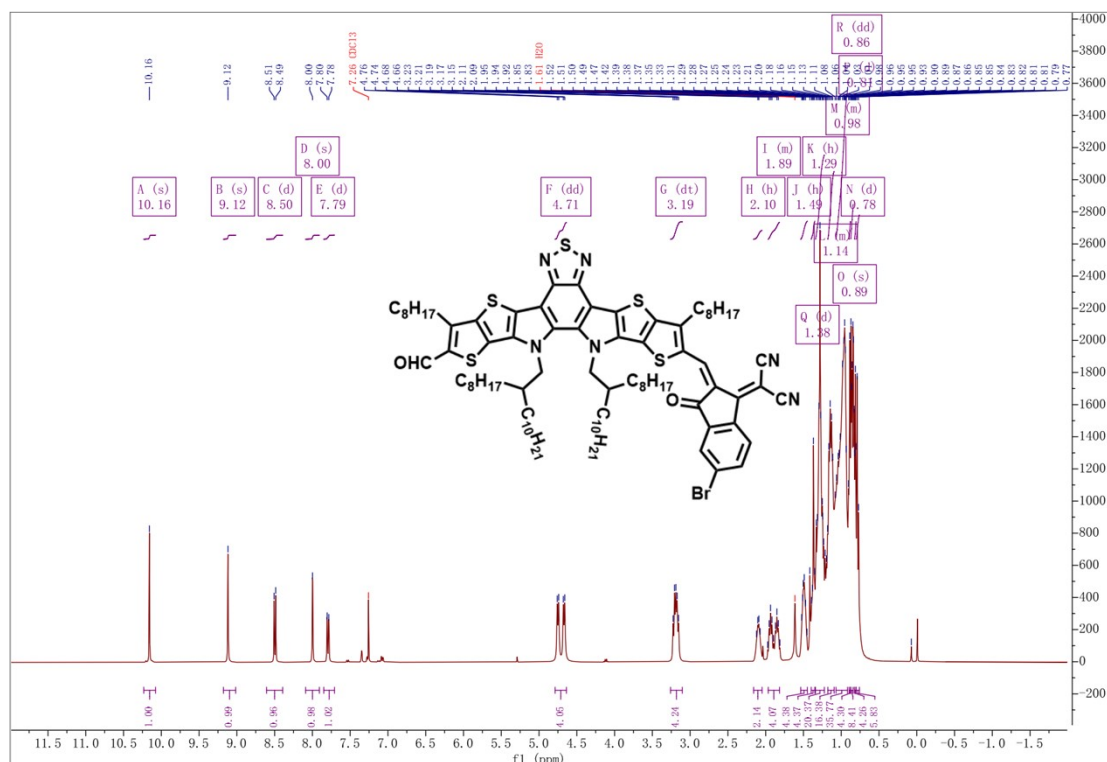

**Figure S6.** <sup>1</sup>H-NMR spectrum of compound 5 (X=S).

**Synthesis of compound 5 (X=Se),** under nitrogen, compound 4 (X=Se) (1.30 g, 0.95 mmol), compound **d** 2-(5-bromo-3-oxo-2,3-dihydro-1H-inden-1-ylidene) malononitrile (0.26 g, 0.95 mmol), BF<sub>3</sub>OEt<sub>2</sub> (0.80 ml), acetic anhydride Ac<sub>2</sub>O (1.00 ml) and toluene (15 ml) were added to a 50 ml round-bottled flask. After the reaction performed at 60 °C for 30 minutes, the mixture was poured into methanol and filtered. The residue was purified in a silica gel column using petroleum ether/chloroform (1.5/1, v/v) as the eluent. Compound 5 (X=Se) was obtained as a green solid (0.93 g, 60% yield).

<sup>1</sup>H NMR (CDCl<sub>3</sub>): 10.06 (s, 1H), 9.25 (s, 1H), 8.51 (d, J=8.4 Hz, 1H), 8.00 (d, J=1.8 Hz, 1H), 7.81 (d, J=8.4 Hz, 1H), 4.65 (dd, J=23.3, 7.7 Hz, 4H), 3.20 (q, J=7.9 Hz, 4H), 2.10 (h, J=6.6 Hz, 2H), 1.89 (dp, J=33.6, 7.8 Hz, 4H), 1.55-1.46 (m, 4H), 1.37 (d, J=5.0 Hz, 4H), 1.30 (dt, J=21.0, 9.0 Hz, 18H), 1.15 (dt, J=10.4, 6.5 Hz, 12H), 1.06 (ddd, J=18.6, 9.7, 4.2 Hz, 16H), 1.00-0.94 (m, 16H), 0.93-0.81 (m, 28H), 0.78 (d, J=7.5 Hz, 6H).



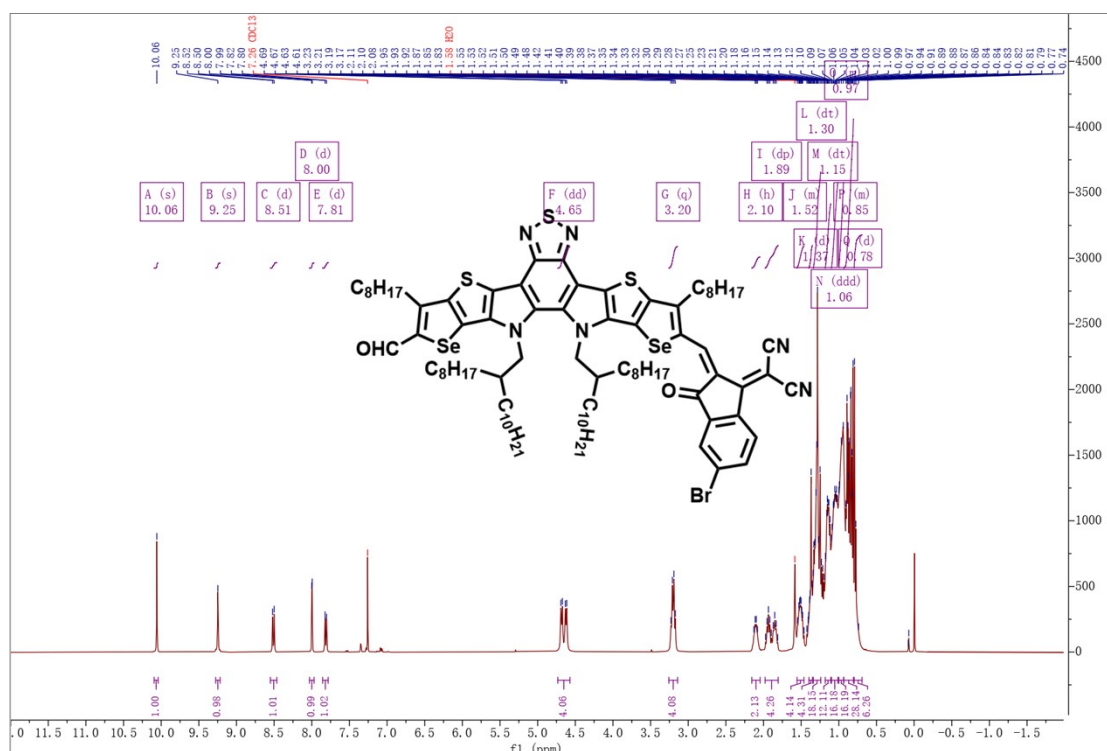

**Figure S7.**  $^1\text{H}$ -NMR spectrum of compound **5** (X=Se).

**Synthesis of compound 6 (X=S, Y=S) and GMA-SSS, compound 5 (X=S)** (0.44 g, 0.29 mmol), compound **e** (2,5-bis-trimethylstannyl-thiophene) (0.054 g, 0.13 mmol) and  $\text{Pd}(\text{PPh}_3)_4$  (0.023 g, 0.02 mmol) were dissolved in toluene (20 ml) and stirred at 110 °C for 5 h under nitrogen atmosphere. The solvent was removed under vacuum after the reaction mixture was cooled to ambient temperature. Compound **6** (X=S, Y=S) were purified by chromatography in a silica gel column eluting with petroleum ether/dichloromethane (1/1.5, v/v), which yielding a blue solid as product **6** (X=S, Y=S) (0.27 g, 70% yield).

$^1\text{H}$  NMR ( $\text{CDCl}_3$ ): 10.17 (s, 2H), 9.15 (s, 2H), 8.75 (d,  $J=8.3$  Hz, 2H), 8.12 (s, 2H), 7.99-7.91 (m, 2H), 7.62 (s, 2H), 4.73 (dd,  $J=33.8, 7.7$  Hz, 8H), 3.21 (q,  $J=7.6$  Hz, 8H), 2.12 (dt,  $J=12.6, 6.7$  Hz, 4H), 1.91 (dt,  $J=26.5, 7.6$  Hz, 8H), 1.49 (dd,  $J=14.7, 7.1$  Hz, 8H), 1.42-1.35 (m, 8H), 1.35-1.20 (m, 40H), 1.14 (dt,  $J=17.8, 5.1$  Hz, 32H), 1.08-0.92 (m, 72H), 0.89 (s, 8H), 0.88-0.84 (m, 16H), 0.83 (d,  $J=2.8$  Hz, 8H), 0.81-0.76 (m, 12H).

Under nitrogen, compound **6** (X=S, Y=S) (0.27 g, 0.09 mmol), compound **f** 2-(5,6-difluoro-3-oxo-2,3-dihydro-1H-inden-1-ylidene) malononitrile (0.083 g, 0.36 mmol),  $\text{BF}_3\text{OEt}_2$  (0.40 ml), acetic anhydride  $\text{Ac}_2\text{O}$  (0.50 ml) and toluene (10 ml) were added to a 25 ml round-bottled flask. After the reaction performed at 60 °C for 30 minutes, the

mixture was poured into methanol and filtered. The residue was purified in a silica gel column using petroleum ether/chloroform (1/2, v/v) as the eluent. Compound **GMA-SSS** was obtained as a dark blue solid (0.28 g, 90% yield).

$^1\text{H NMR}$  ( $\text{CDCl}_3$ ): 9.08 (s, 4H), 8.69 (d,  $J=8.4$  Hz, 2H), 8.59-8.49 (m, 2H), 8.04 (s, 2H), 7.90 (d,  $J=8.5$  Hz, 2H), 7.66 (dd,  $J=14.4, 6.3$  Hz, 4H), 4.96-4.74 (m, 8H), 3.18 (s, 8H), 2.33-2.18 (m, 4H), 1.87 (s, 8H), 1.52 (t,  $J=7.6$  Hz, 8H), 1.40-1.35 (m, 8H), 1.29 (s, 40H), 1.18-1.12 (m, 32H), 1.07 (q,  $J=12.0, 11.0$  Hz, 72H), 0.89 (t,  $J=6.3$  Hz, 20H), 0.81 (q,  $J=8.8, 7.9$  Hz, 24H).

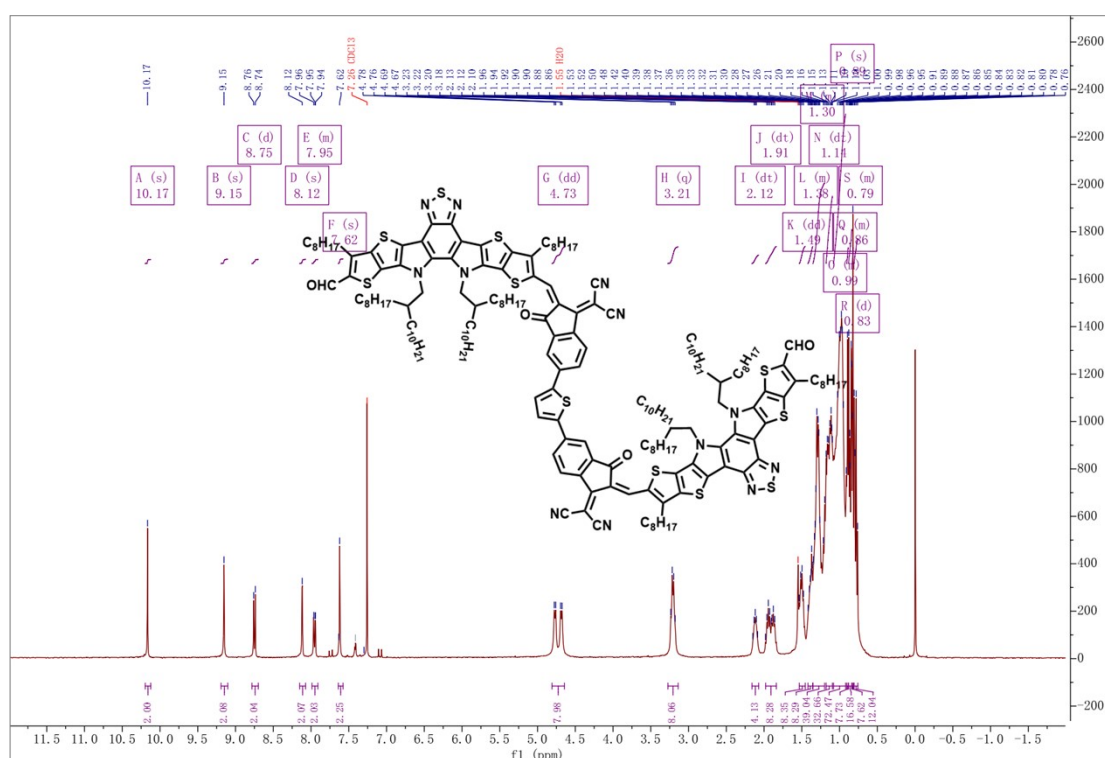

**Figure S8.**  $^1\text{H-NMR}$  spectrum of compound 6 ( $\text{X}=\text{S}, \text{Y}=\text{S}$ ).

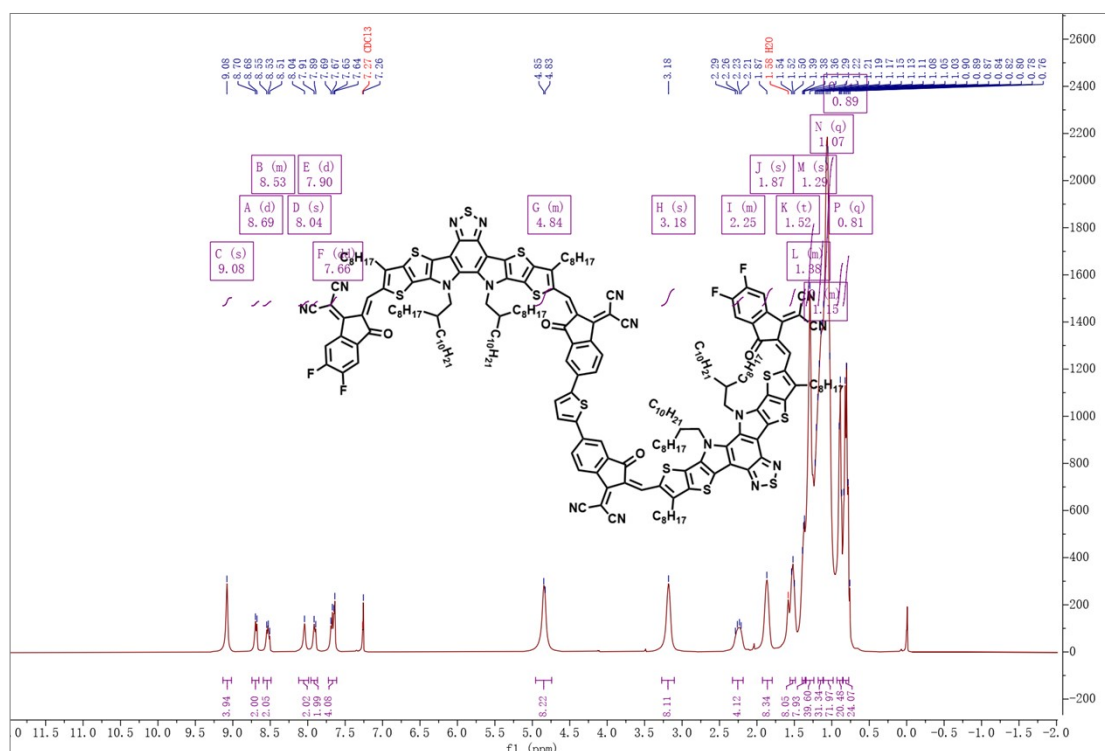

**Figure S9.**  $^1\text{H}$ -NMR spectrum of compound GMA-SSS.

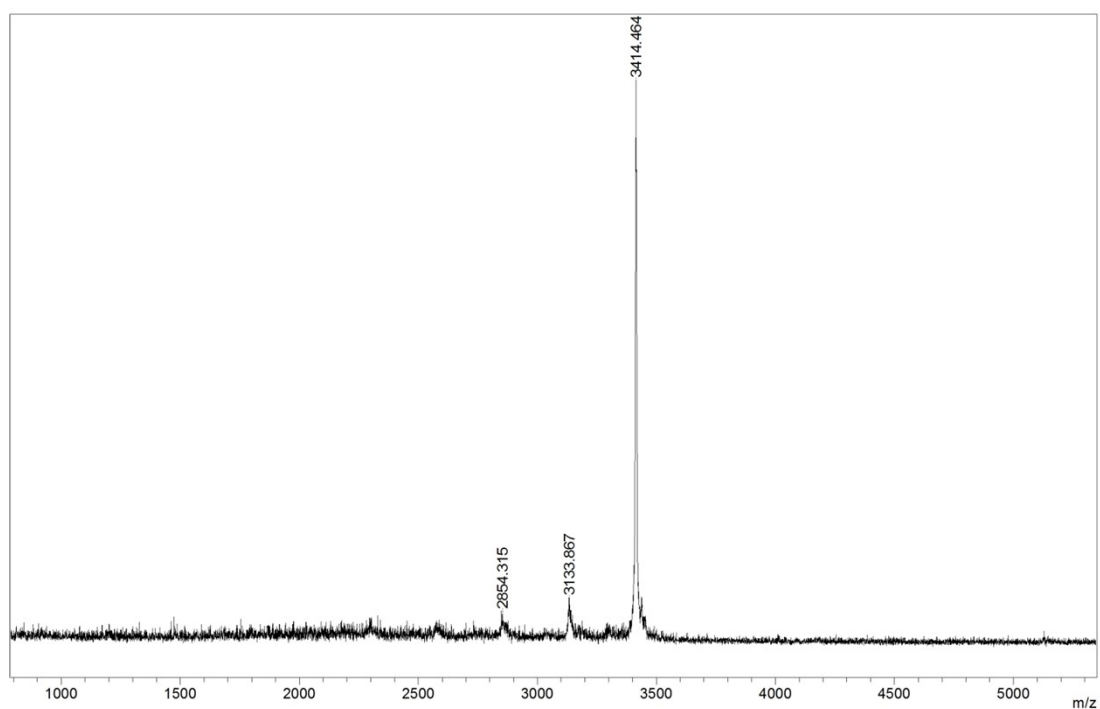

**Figure S10.** MALDI-TOF spectrum of GMA-SSS.

**Synthesis of compound 6 (X=S, Y=Se) and GMA-SSeS, compound 5 (X=S) (0.44 g, 0.29 mmol), compound e (2,5-bis-trimethylstannyl-selenophen) (0.059 g, 0.13 mmol) and Pd(PPh<sub>3</sub>)<sub>4</sub> (0.023 g, 0.02 mmol) were dissolved in toluene (20 ml) and stirred at 110 °C for 5 h under nitrogen atmosphere. The solvent was removed under vacuum**

after the reaction mixture was cooled to ambient temperature. Compound **6** (**X=S**, **Y=Se**) were purified by chromatography in a silica gel column eluting with petroleum ether/dichloromethane (1/1.5, v/v), which yielding a blue solid as product **6** (**X=S**, **Y=Se**) (0.28 g, 70% yield).

<sup>1</sup>H NMR (CDCl<sub>3</sub>): 10.17 (s, 2H), 9.10 (s, 2H), 8.69 (d, J=8.2 Hz, 2H), 8.03 (s, 2H), 7.89-7.74 (m, 4H), 4.75 (dd, J=33.4, 7.6 Hz, 8H), 3.19 (dt, J=25.8, 7.9 Hz, 8H), 2.15 (dq, J=13.6, 6.3 Hz, 4H), 1.90 (dt, J=37.7, 7.7 Hz, 8H), 1.50 (dd, J=8.9, 4.8 Hz, 8H), 1.38 (d, J=14.0 Hz, 8H), 1.29 (ddd, J=13.0, 10.8, 5.8 Hz, 32H), 1.13 (ddd, J=15.0, 7.5, 3.3 Hz, 40H), 1.08-0.92 (m, 72H), 0.90 (d, J=6.5 Hz, 8H), 0.86 (d, J=7.1 Hz, 16H), 0.83 (d, J=3.2 Hz, 8H), 0.78 (t, J=7.5 Hz, 12H).

Under nitrogen, compound **6** (**X=S**, **Y=Se**) (0.28 g, 0.09 mmol), compound **f** 2-(5,6-difluoro-3-oxo-2,3-dihydro-1H-inden-1-ylidene) malononitrile (0.083 g, 0.36 mmol), BF<sub>3</sub>OEt<sub>2</sub> (0.40 ml), acetic anhydride Ac<sub>2</sub>O (0.50 ml) and toluene (10 ml) were added to a 25 ml round-bottled flask. After the reaction performed at 60 °C for 30 minutes, the mixture was poured into methanol and filtered. The residue was purified in a silica gel column using petroleum ether/chloroform (1/2, v/v) as the eluent. Compound **GMA-SSeS** was obtained as a dark blue solid (0.28 g, 90% yield).

<sup>1</sup>H NMR (CDCl<sub>3</sub>): 9.11 (d, J=8.7 Hz, 4H), 8.71 (d, J=8.0 Hz, 2H), 8.55 (dd, J=9.9, 6.4 Hz, 2H), 8.05 (s, 2H), 7.89 (d, J=8.3 Hz, 2H), 7.81 (s, 2H), 7.65 (t, J=7.5 Hz, 2H), 4.82 (d, J=7.8 Hz, 8H), 3.20 (t, J=8.0 Hz, 8H), 2.19 (s, 4H), 1.88 (q, J=7.5 Hz, 8H), 1.53 (t, J=7.7 Hz, 8H), 1.41-1.25 (m, 40H), 1.19-1.11 (m, 32H), 1.03 (d, J=10.3 Hz, 72H), 0.92-0.86 (m, 20H), 0.83-0.77 (m, 24H).

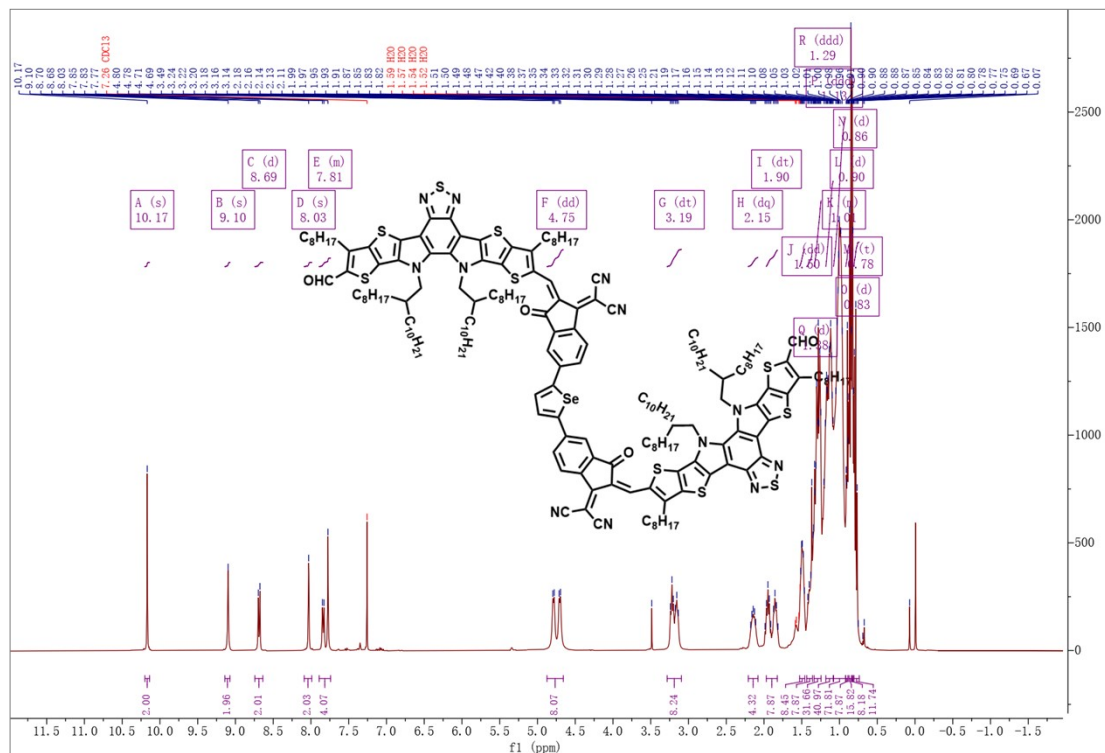

**Figure S11.** <sup>1</sup>H-NMR spectrum of compound 6 (X=S, Y=Se).

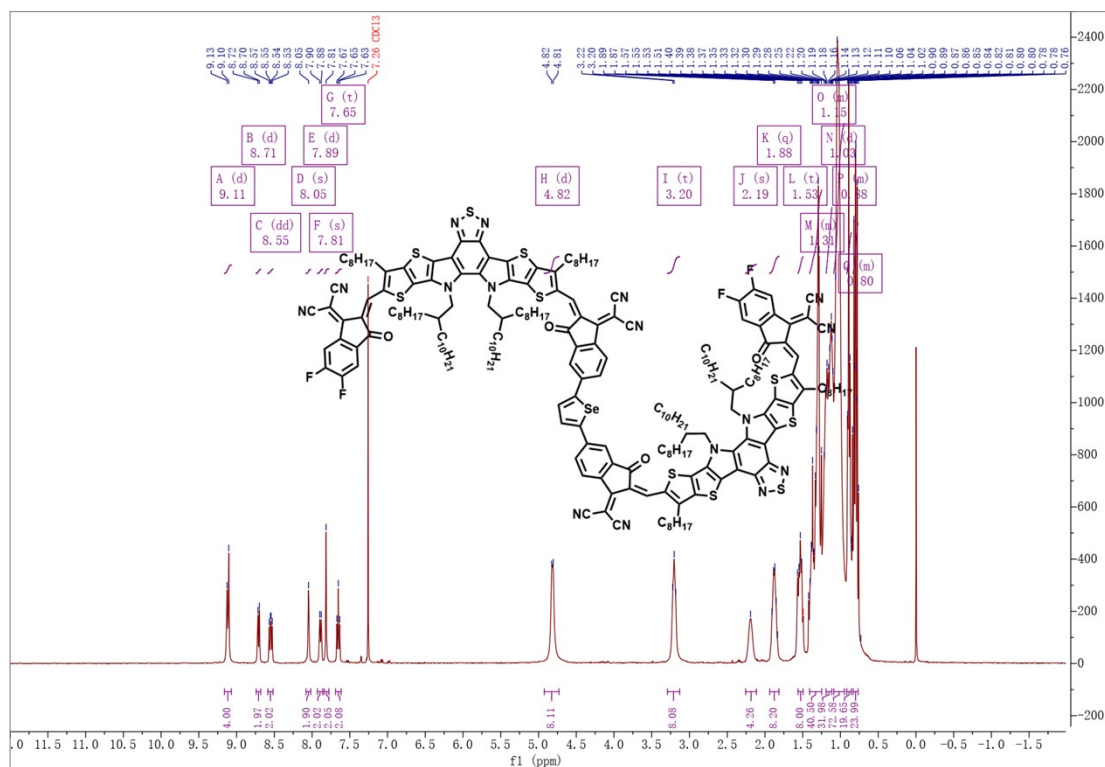

**Figure S12.** <sup>1</sup>H-NMR spectrum of compound GMA-SSeS.

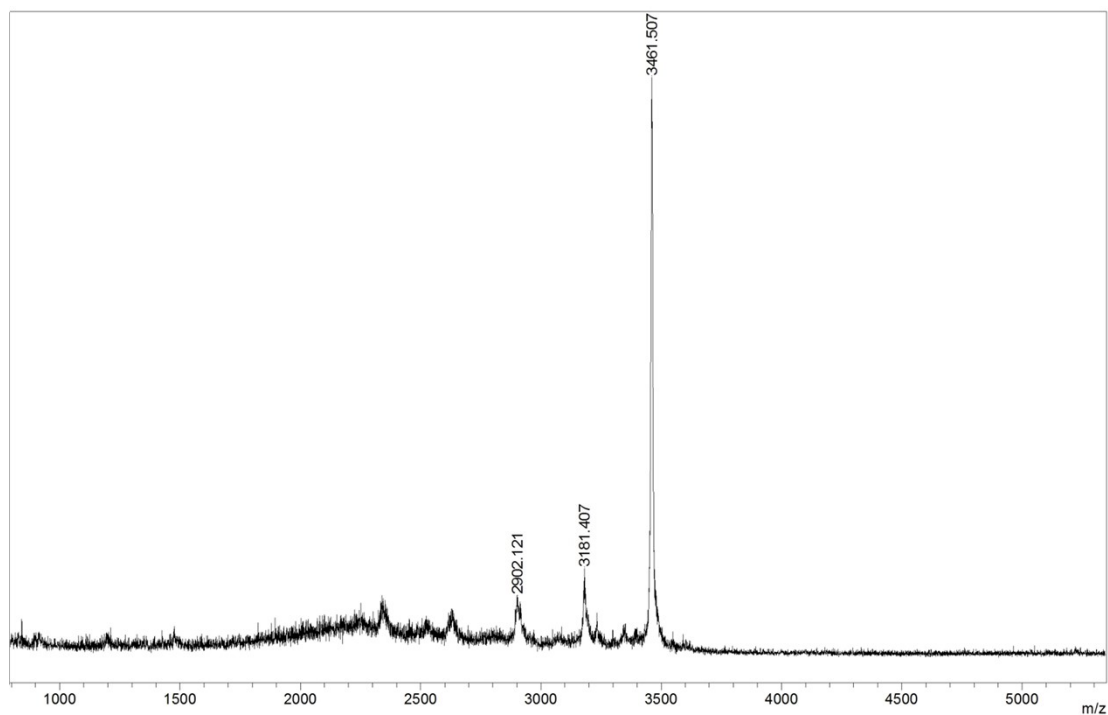

**Figure S13.** MALDI-TOF spectrum of **GMA-SSeS**.

**Synthesis of compound 6 (X=Se, Y=S) and GMA-SeSSe, compound 5 (X=Se)** (0.46 g, 0.29 mmol), compound **e** (2,5-bis-trimethylstannyl- thiophene) (0.054 g, 0.13 mmol) and Pd(PPh<sub>3</sub>)<sub>4</sub> (0.023 g, 0.02 mmol) were dissolved in toluene (20 ml) and stirred at 110 °C for 5 h under nitrogen atmosphere. The solvent was removed under vacuum after the reaction mixture was cooled to ambient temperature. Compound **6 (X=Se, Y=S)** were purified by chromatography in a silica gel column eluting with petroleum ether/dichloromethane (1/1.5, v/v), which yielding a blue solid as product **6 (X=Se, Y=S)** (0.25 g, 60% yield).

<sup>1</sup>H NMR (CDCl<sub>3</sub>): 10.06 (s, 2H), 9.27 (s, 2H), 8.75 (d, J=8.3 Hz, 2H), 8.12 (d, J=1.9 Hz, 2H), 7.97 (dd, J=8.3, 1.9 Hz, 2H), 7.62 (s, 2H), 4.67 (dd, J=25.6, 7.7 Hz, 8H), 3.28-3.14 (m, 8H), 2.12 (s, 4H), 1.97-1.84 (m, 8H), 1.60-1.46 (m, 24H), 1.36-1.23 (m, 36H), 1.17-1.03 (m, 48H), 1.02-0.83 (m, 84H), 0.78 (d, J=7.3 Hz, 12H).

Under nitrogen, compound **6 (X=Se, Y=S)** (0.25 g, 0.08 mmol), compound **f** 2-(5,6-difluoro-3-oxo-2,3-dihydro-1H-inden-1-ylidene) malononitrile (0.074 g, 0.32 mmol), BF<sub>3</sub>OEt<sub>2</sub> (0.40 ml), acetic anhydride Ac<sub>2</sub>O (0.50 ml) and toluene (10 ml) were added to a 25 ml round-bottled flask. After the reaction performed at 60 °C for 30 minutes, the mixture was poured into methanol and filtered. The residue was purified in a silica gel

column using petroleum ether/chloroform (1/3, v/v) as the eluent. Compound **GMA-SeSse** was obtained as a dark blue solid (0.23 g, 80% yield).

$^1\text{H NMR}$  ( $\text{CDCl}_3$ ): 9.22 (d,  $J=15.7$  Hz, 4H), 8.72 (d,  $J=8.2$  Hz, 2H), 8.55 (dd,  $J=9.9, 6.4$  Hz, 2H), 8.06 (s, 2H), 7.96 (d,  $J=8.2$  Hz, 2H), 7.68-7.61 (m, 4H), 4.74 (s, 8H), 3.27 (s, 8H), 1.87 (s, 8H), 1.56 (s, 20H), 1.43-1.24 (m, 36H), 1.19-1.10 (m, 40H), 1.04 (s, 64H), 0.93-0.85 (m, 20H), 0.80 (p,  $J=7.2$  Hz, 24H).

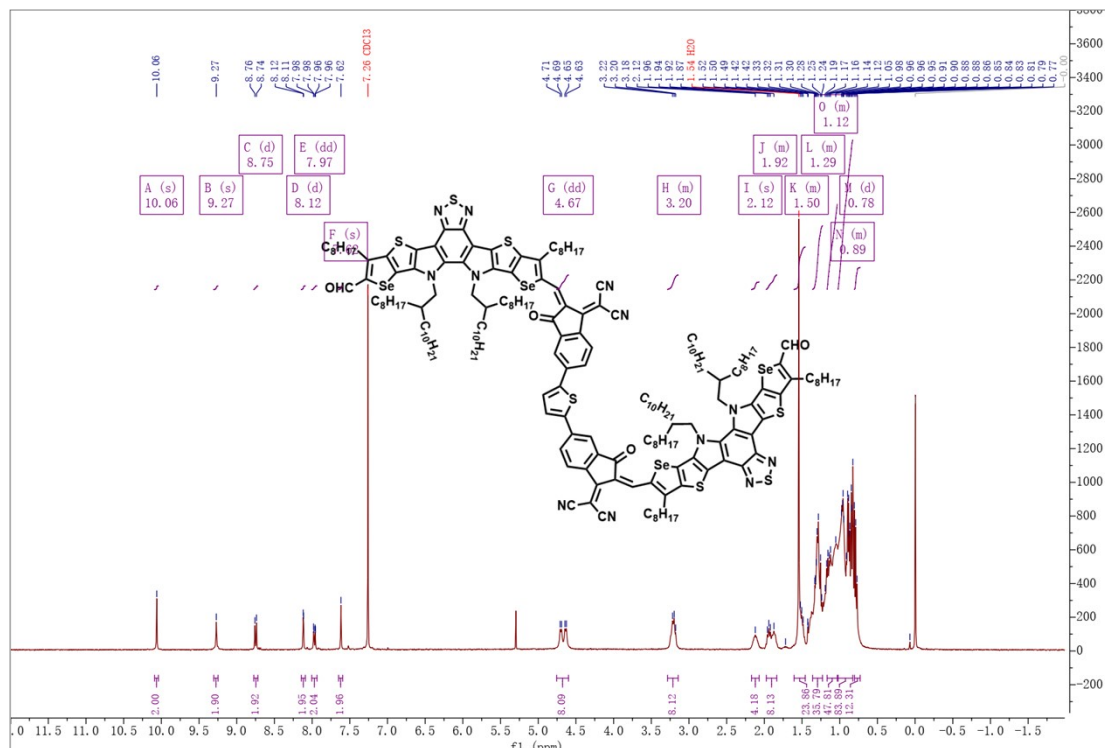

**Figure S14.**  $^1\text{H-NMR}$  spectrum of compound **6** ( $X=\text{Se}$ ,  $Y=\text{S}$ ).

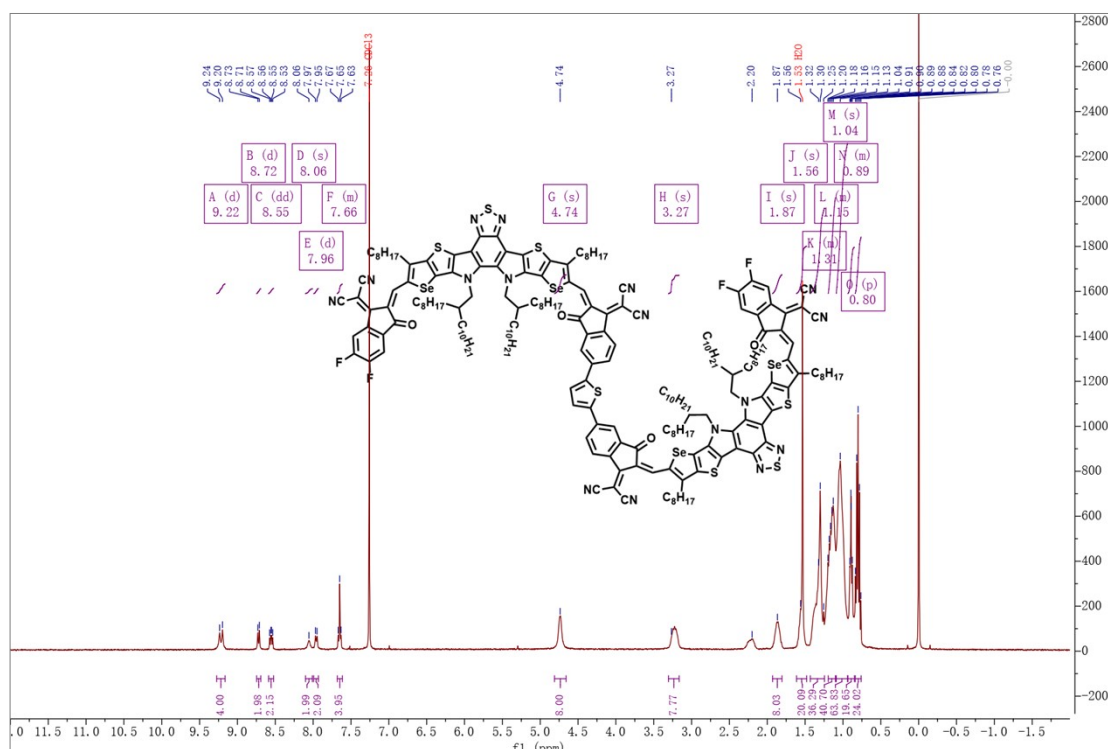

**Figure S15.**  $^1\text{H-NMR}$  spectrum of compound GMA-SeSSe.

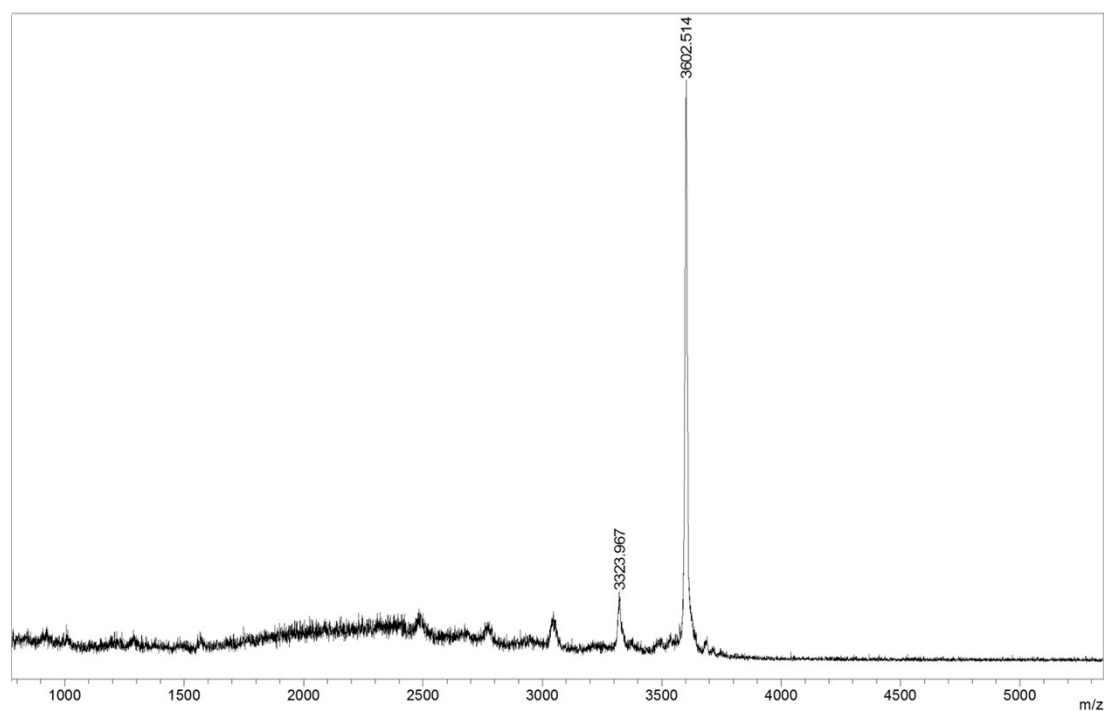

**Figure S16.** MALDI-TOF spectrum of GMA-SeSSe.

**Synthesis of compound 6 (X=Se, Y=Se) and GMA-SeSeSe, compound 5 (X=Se)** (0.46 g, 0.29 mmol), compound e (2,5-bis-trimethylstannyl-selenophen) (0.059 g, 0.13 mmol) and  $\text{Pd}(\text{PPh}_3)_4$  (0.023 g, 0.02 mmol) were dissolved in toluene (20 ml) and stirred at 110 °C for 5 h under nitrogen atmosphere. The solvent was removed under



vacuum after the reaction mixture was cooled to ambient temperature. Compound **6** (**X=Se, Y=Se**) were purified by chromatography in a silica gel column eluting with petroleum ether/dichloromethane (1/2, v/v), which yielding a blue solid as product **6** (**X=Se, Y=Se**) (0.21 g, 50% yield).

<sup>1</sup>H NMR (CDCl<sub>3</sub>): 10.08 (s, 2H), 9.19 (s, 2H), 8.68 (d, J=8.3 Hz, 2H), 7.99 (s, 2H), 7.84 (d, J=8.2 Hz, 2H), 7.75 (s, 2H), 4.80-4.58 (m, 8H), 3.28-3.06 (m, 8H), 2.15 (s, 4H), 1.95 (t, J=8.1 Hz, 4H), 1.83 (s, 4H), 1.31 (dd, J=33.2, 13.6 Hz, 76H), 1.13 (s, 36H), 0.98 (s, 32H), 0.84 (td, J = 17.4, 16.1, 8.9 Hz, 60H).

Under nitrogen, compound **6** (**X=Se, Y=Se**) (0.21 g, 0.09 mmol), compound **f** 2-(5,6-difluoro-3-oxo-2,3-dihydro-1H-inden-1-ylidene) malononitrile (0.083 g, 0.36 mmol), BF<sub>3</sub>OEt<sub>2</sub> (0.40 ml), acetic anhydride Ac<sub>2</sub>O (0.50 ml) and toluene (10 ml) were added to a 25 ml round-bottled flask. After the reaction performed at 60 °C for 30 minutes, the mixture was poured into methanol and filtered. The residue was purified in a silica gel column using petroleum ether/chloroform (1/5, v/v) as the eluent. Compound **GMA-SeSeSe** was obtained as a dark blue solid (0.16 g, 50% yield).

<sup>1</sup>H NMR (CDCl<sub>3</sub>): 9.20 (d, J=10.1 Hz, 4H), 8.68 (d, J=8.0 Hz, 2H), 8.54 (dd, J=9.8, 6.4 Hz, 2H), 7.98 (s, 2H), 7.88 (d, J=8.5 Hz, 2H), 7.81 (s, 2H), 7.65 (t, J=7.5 Hz, 2H), 4.75 (s, 8H), 3.21 (d, J=9.8 Hz, 8H), 2.21 (s, 4H), 1.86 (q, J=8.3, 7.8 Hz, 8H), 1.58-1.22 (m, 76H), 1.09 (dq, J=24.0, 13.9, 12.7 Hz, 88H), 0.89 (t, J=6.4 Hz, 16H), 0.81 (q, J=6.6 Hz, 24H).

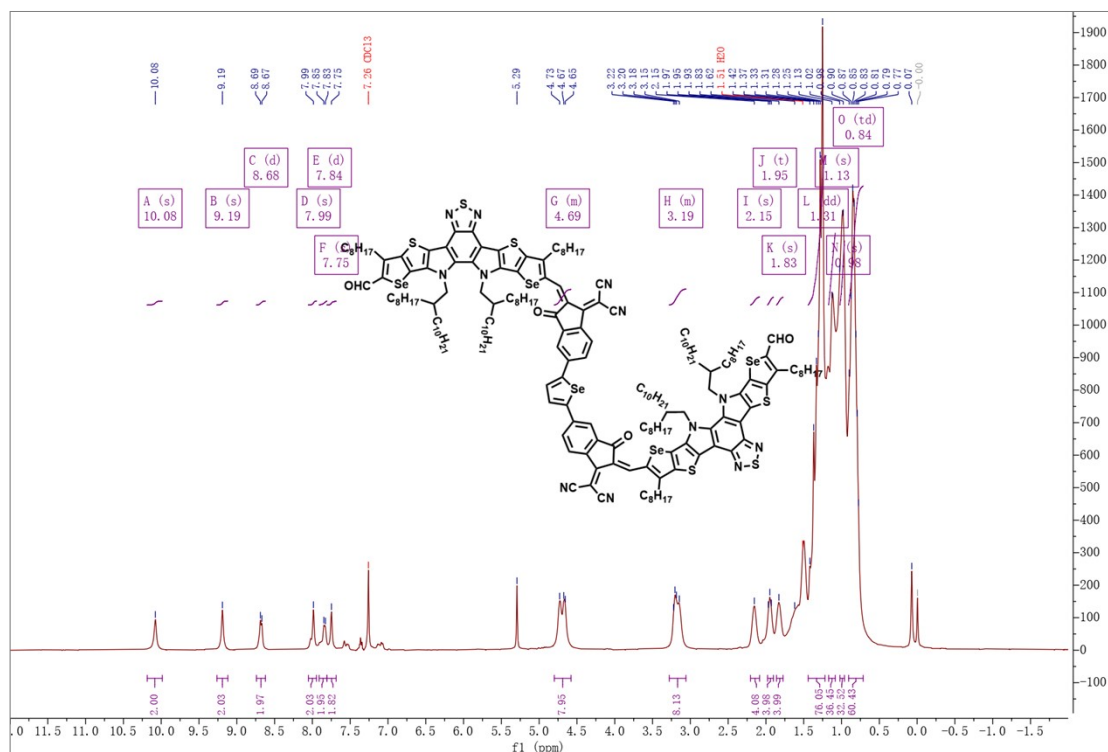

Figure S17.  $^1\text{H-NMR}$  spectrum of compound 6 (X=Se, Y=Se).

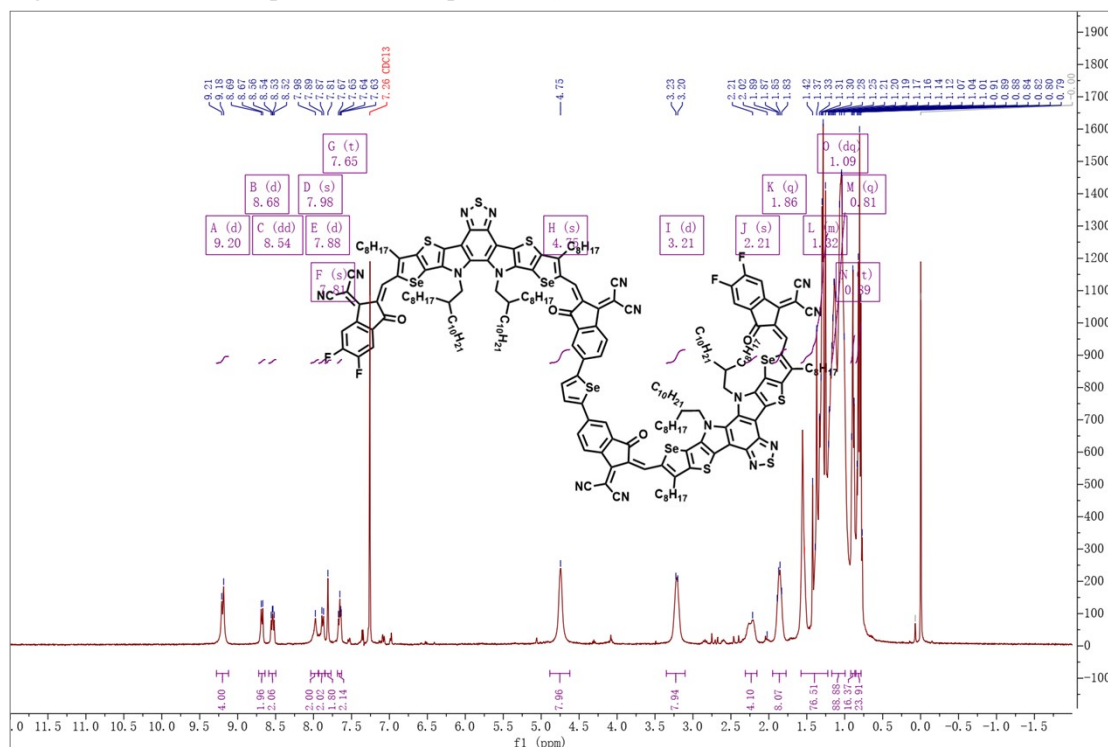

Figure S18.  $^1\text{H-NMR}$  spectrum of compound GMA-SeSeSe.

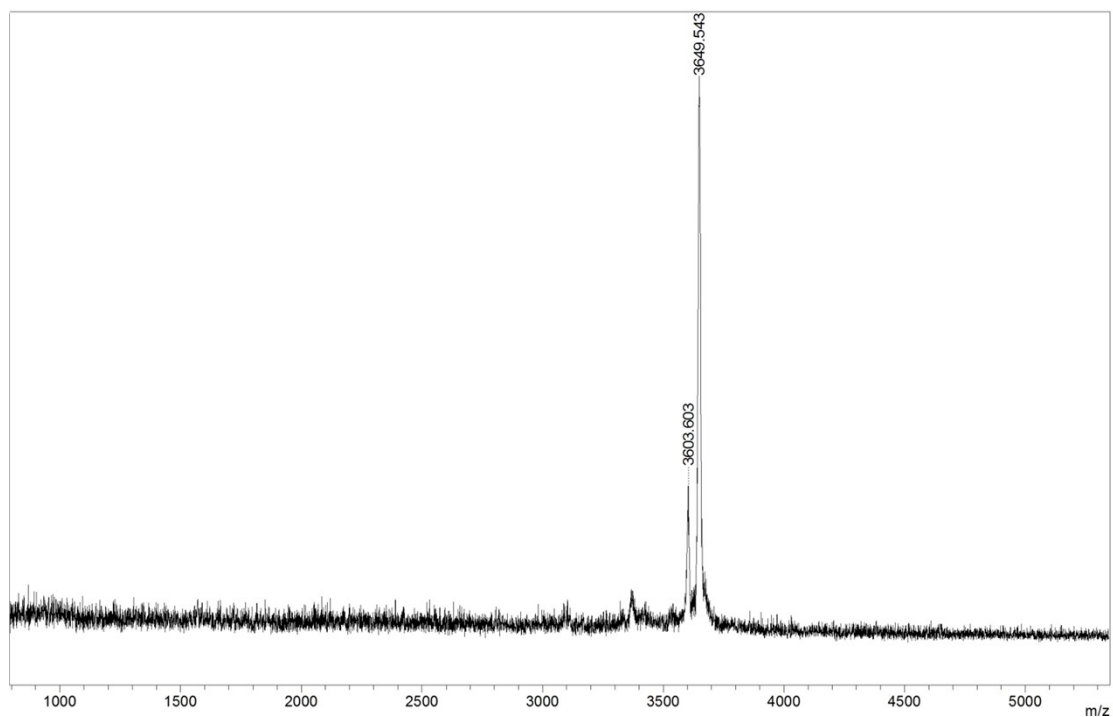

**Figure S19.** MALDI-TOF spectrum of GMA-SeSeSe.

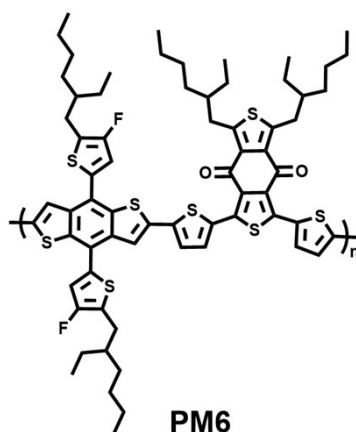

**Figure S20.** The chemical structure of PM6.

### 3. Measurements

#### Device fabrication and measurement

The OSCs were fabricated employing the conventional architecture of ITO/2PACz /PM6:GMAs/PDINN/Ag). The ITO glass was cleaned with deionized water, acetone and isopropanol in sequence, then treated with the UV-Ozone for 15 minutes. The 2PACz solution was spin-coated at 4000 rpm onto the ITO substrates for 30 seconds.

The PM6 and GMAs were dissolved in solution with a ratio of 1:1 (w/w), the concentration of PM6 in CF solvent was 7 mg ml<sup>-1</sup>, and the solution were stirred at

45°C for 2h. Then the donor and GMAs were spin-coated with a speed of 3000 r min<sup>-1</sup> on the 2PACz layer and treated with thermal annealing at 100°C for 5 minutes. With the PDINN (1 mg ml<sup>-1</sup>, 2000 r min<sup>-1</sup>) spin-coated on the active layer, the devices were finally transferred to the evaporation tank to deposit 150 nm Ag. *J-V* measurements of devices were carried out in the Keithley 2440 source meter with a solar simulator (Newport-Oriel® Sol3A 450W) device. EQE measurements were conducted with the solar cell QE tester (QE-R, Enli Technology Co., Ltd).

### **Optical characterization and Estimation of glass-transition temperature:**

UV-Vis-NIR absorption spectra were acquired on a Perkin-Elmer Lambda 950 spectrophotometer.

Photoluminescence spectra were acquired on a HORIBA FL3-111 spectrophotometer. The glass transition temperature ( $T_g$ ) of GMA corresponds to an onset temperature at which the GMA becomes mobile to reorganize the imperfect GMAs crystals. UV-vis spectroscopy was used to determine  $T_g$ s of the GMAs. The absorption spectra of GMAs films were measured with increasing thermal annealing temperatures from room temperature to 240 °C. Then, a deviation metric ( $DM_T$ ) was calculated by quantifying the change in the absorbance of each film during annealing, following the method from Samuel E. Root et al.<sup>[1]</sup>

$$DM_T = \sum_{\lambda_{min}}^{\lambda_{max}} [I_{RT}(\lambda) - I_T(\lambda)]^2$$

where  $\lambda$  is the wavelength,  $\lambda_{max}$  and  $\lambda_{min}$  are the upper and lower bounds of the optical sweep, respectively.  $I_{RT}(\lambda)$  and  $I_T(\lambda)$  are the normalized absorption intensities of the as-cast (room temperature) and annealed films, respectively. Then,  $T_g$ s were determined to points where the two interpolated lines in low- and high-temperature regions intersect.

### **Estimation of diffusion coefficient at 85°C ( $D_{85}$ ):**

The  $D_{85}$ s of the GMAs (in blend films with PM6) were estimated following the method (*i.e.*, Ghasemi–O’Connor–Ade framework) in previous literature.<sup>[2]</sup> In the study, Ghasemi *et al.* estimated  $T_g$ s (or coldcrystallization temperatures,  $T_{cc}$ s) of various

acceptor constituents (*i.e.*, EH-IDTBR, di-PDI, IT-M, IEICO-Cl, ITIC-4Cl, and Y6) by measuring  $DM_T$  of UV-absorbances or DSC of pristine acceptor materials. They also monitored  $D_{85}$ s of the acceptor constituents in blend films with specific donors (*i.e.*, P3HT, FTAZ/HTAZ, PTB7-Th, and PBDB-T/PBDB-T2F (PM6)) at 85°C by obtaining time-of-flight secondary ion mass spectrometry (ToF-SIMS) profiles. They found that  $D_{85}$ s of the acceptors (in the blend films with given donors) had strong correlation with their  $T_g$ s, showing an exponential decrease in the  $D_{85}$  as the  $T_g$  increased ( $D_{85}(\text{cm}^2 \text{ s}^{-1}) = a \times e^{b \times T_g(\text{K})}$ ); the coefficients (a and b) in the exponential equations were determined depending on the given donors. When PM6 or PBDB-T donor was used, the  $D_{85}$ s of the acceptor components in the blend with donors were determined as  $D_{85}(\text{cm}^2 \text{ s}^{-1}) = 1.2 \times 10^7 \times e^{-0.15 \times T_g(\text{K})}$ .

Therefore, in this study, we estimated the  $D_{85}$ s of four GMAs in their blends with donor PM6 by using the same correlation of  $D_{85}(\text{cm}^2 \text{ s}^{-1}) = 1.2 \times 10^7 \times e^{-0.15 \times T_g(\text{K})}$ . And, the  $T_g$ s were measured from the  $DM_T$  of film UV-Vis absorbances ( $T_g$  of GMA-SSS = 471.15 K,  $T_g$  of GMA-SSeS = 461.15 K,  $T_g$  of GMA-SeSSe = 463.15 K, and  $T_g$  of GMA-SeSeSe = 425.15 K). We obtained the  $D_{85}$  of GMA-SSS =  $2.44 \times 10^{-24} \text{ cm}^2 \text{ s}^{-1}$ ,  $D_{85}$  of GMA-SSeS =  $1.09 \times 10^{-23} \text{ cm}^2 \text{ s}^{-1}$ ,  $D_{85}$  of GMA-SeSSe =  $8.08 \times 10^{-24} \text{ cm}^2 \text{ s}^{-1}$  and  $D_{85}$  of GMA-SeSeSe =  $4.21 \times 10^{-23} \text{ cm}^2 \text{ s}^{-1}$ .

### Cyclic Voltammetry (CV)

The energy levels for PM6, GMA-SSS, GMA-SSeS, GMA-SeSSe and GMA-SeSeSe were measured by cyclic voltammetry (CV), which was performed by using Ag/AgCl as reference electrode in  $\text{C}_{16}\text{H}_{36}\text{NPF}_6$  solution, and ferrocene/ferrocenium (Fc/Fc<sup>+</sup>) (-0.1 eV versus Ag/AgCl) was used as internal reference. The HOMO and LUMO were calculated according to the following equation:

$$E_{\text{HOMO/LUMO}} = -(\varphi_{\text{ox/red}} - \varphi_{\text{Fc/Fc}^+} + 4.8) \text{ eV}$$

Where  $\varphi_{\text{ox}}$  is the onset of oxidation and the  $\varphi_{\text{red}}$  relates to the reduction potential, respectively.

### Space charge limited current (SCLC) method

Electron-only devices were fabricated using the structure of ITO/Al/active layers/PDINN/Ag. Firstly, after being cleaned with deionized water, acetone and

isopropanol, the all-ITO glass was deposited with 100 nm Al and then the blends of PM6 and GMAs were spin-coated on the Al layer and treated with 95 °C for 5 minutes. With the PDINN spin-coated on the active layer, the devices were finally transferred to the evaporation tank to deposit 150 nm Ag.

Hole-only devices were fabricated with the structure of ITO/2PACz/active layers/MoO<sub>3</sub>/Ag. After being cleaned with deionized water, acetone and isopropanol, the all-ITO glass was treated with the UV-Ozone for 15 minutes. The 2PACz solution was spin-coated at 4000 rpm onto the ITO substrates for 30 seconds. Then the blends of PM6 and GMAs were spin-coated on the 2PACz layer and treated with 95°C for 5 minutes. Then devices were finally transferred to the evaporation tank to deposit 10 nm MoO<sub>3</sub> and then 150 nm Ag.

The mobilities were obtained by taking current-voltage curves and fitting the results to a space charge limited form, where the SCLC is described by:

$$J = \frac{9\varepsilon_0\varepsilon_R\mu V^2}{8L^3}$$

Where  $\varepsilon_0$  is the permittivity of free space,  $\varepsilon_R$  is the relative permittivity of the material (assumed to be 3),  $\mu$  is the electron or hole mobility and L is the thickness of the film. From the plots of  $J^{1/2}$  vs  $V$ , electron or hole mobilities can be deduced.

### **Morphology Characterization**

AFM height and phase images were measured by Bruker Dimension ICON to explore the characteristic of morphology. TEM was performed on a JEOL 2100 (JEOL., Ltd). The samples were fabricated in accordance with the conditions of the best devices. GIWAXS was measured by Xeuss 3.0 UHR.

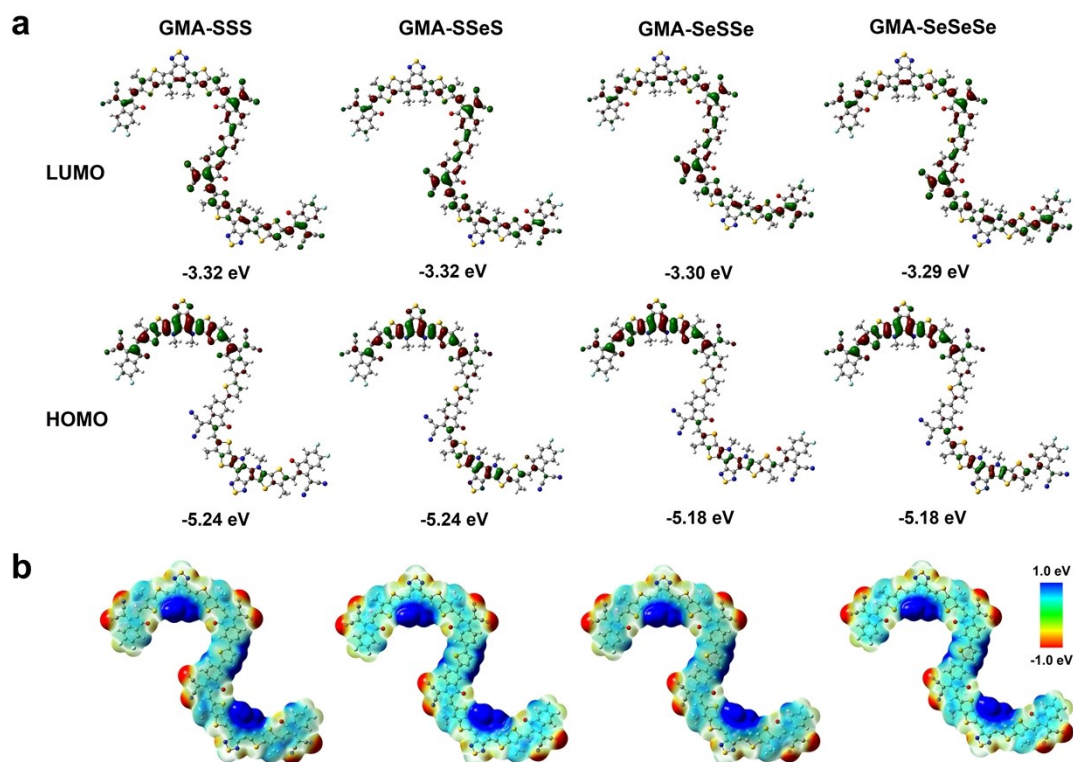

**Figure S21.** (a) The LUMO and HOMO orbitals of GMA-SSS, GMA-SSeS, GMA-SeSSe and GMA-SeSeSe computed with B3LYP/6-31G, and the  $E_g$  values are calculated to be 1.92, 1.92, 1.88 and 1.89 eV, respectively. (b) Map of the electrostatic potential (ESP) surfaces calculated by DFT, where red color indicates greater negative charge and blue color indicates greater positive charge. Most molecular surfaces of four GMAs exhibited positive ESPs, indicating their electron-accepting nature, which are very different with the donor PM6, suggesting good compatibility.

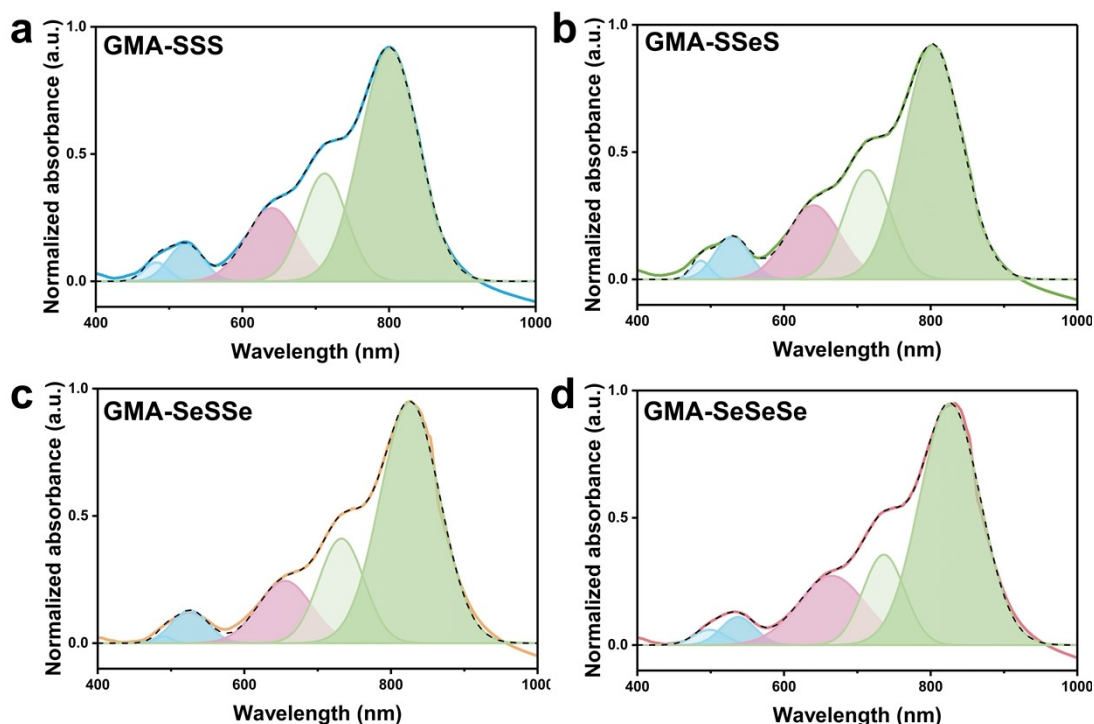

**Figure S22.** Absorption peaks fitting profiles of (a) GMA-SSS, (b) GMA-SSeS, (c) GMA-SeSSe and (d) GMA-SeSeSe neat films. The peaks at ~800 nm (GMA-SSS and GMA-SSeS), ~830 nm (GMA-SeSSe and GMA-SeSeSe) and ~710 nm (GMA-SSS and GMA-SSeS), ~730 nm (GMA-SeSSe and GMA-SeSeSe) are assigned to the  $S_0 \rightarrow S_1$  electronic transition with partial charge transfer (CT) character and its first vibronic (0-1) side band, respectively (green shaded band). The blue shifted bands at ~640 nm (GMA-SSS and GMA-SSeS) and ~660 nm (GMA-SeSSe and GMA-SeSeSe) belong to separate, weakly allowed  $S_0 \rightarrow S_1$  electronic transition due to the presence of amorphous phase (red shaded band). The broad band around 520 nm of four GMAs is associated with  $\pi-\pi^*$  electronic transition (blue shaded band).

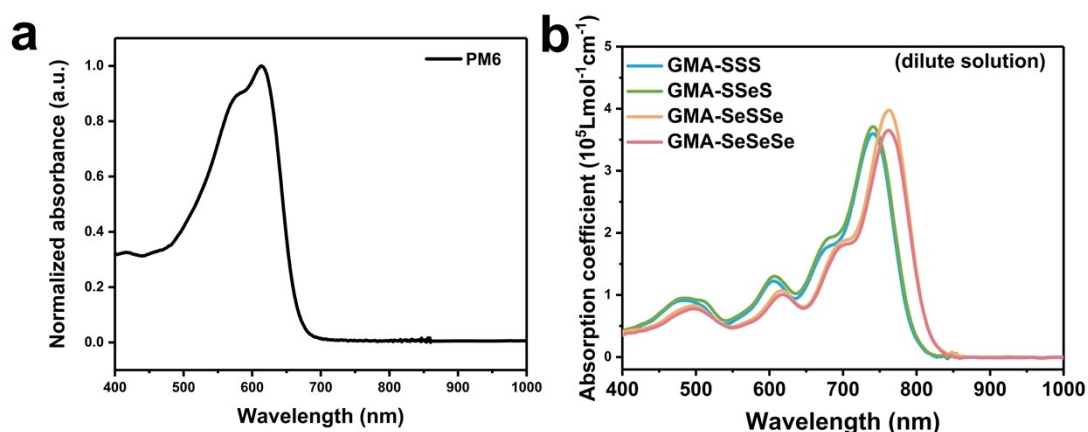

**Figure S23.** (a) Normalized absorption profile of neat PM6 film. (b) Absorption spectra of four GMAs in dilute chloroform solutions, and calculated molar absorption coefficient values of GMA-SSS, GMA-SSeS, GMA-SeSSe and GMA-SeSeSe are  $3.60$ ,  $3.71$ ,  $3.97$  and  $3.65 \times 10^5 \text{ L mol}^{-1} \text{ cm}^{-1}$ , respectively.



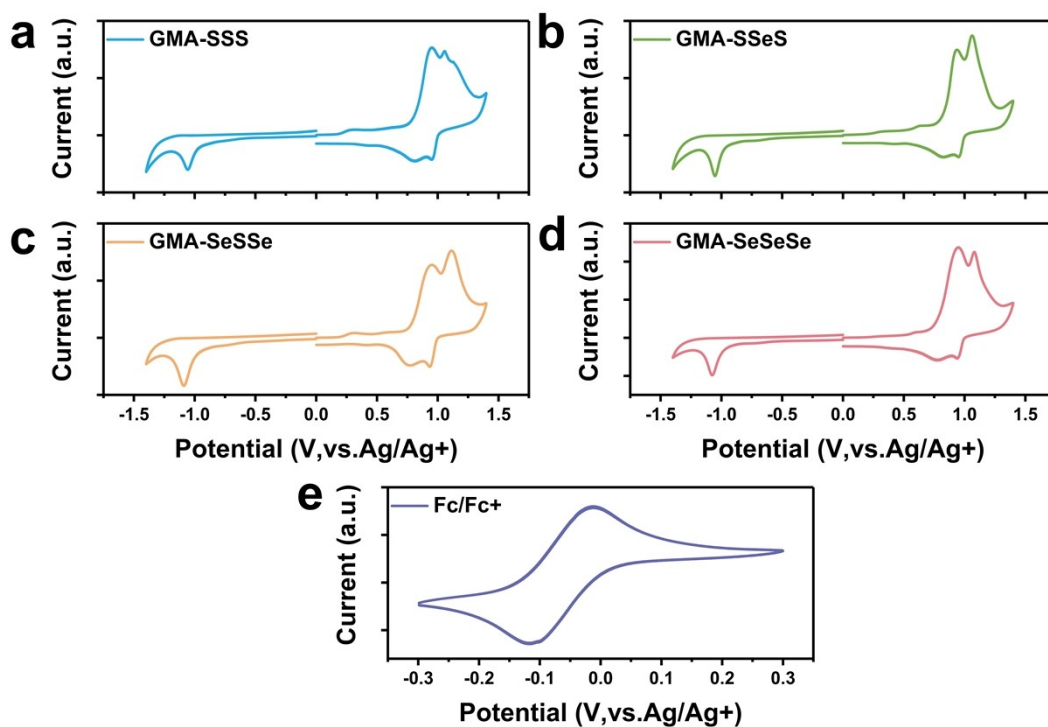

**Figure S24.** Cyclic voltammograms curves of (a) GMA-SSS, (b) GMA-SSeS, (c) GMA-SeSSe, (d) GMA-SeSeSe and (e) ferrocene/ferrocenium.

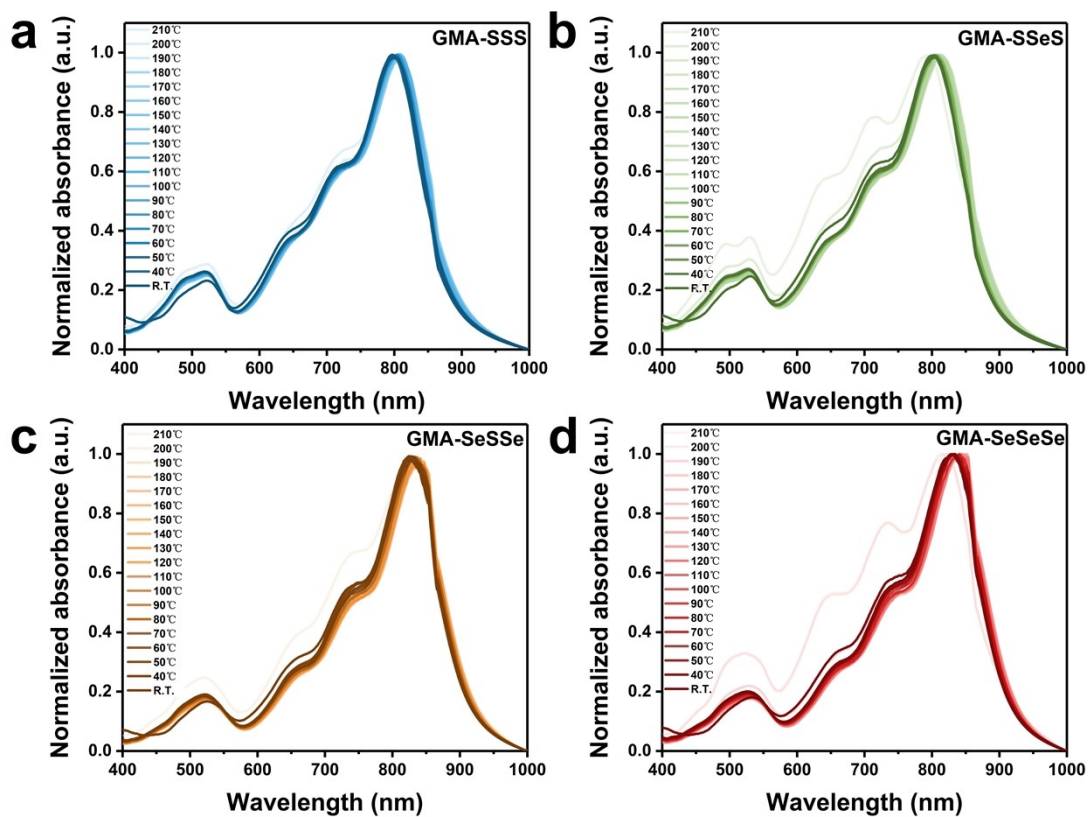

**Figure S25.** UV-Vis absorption spectra of (a) GMA-SSS, (b) GMA-SSeS, (c) GMA-SeSSe and (d) GMA-SeSeSe with increasing thermal annealing temperatures from room temperature (R.T.) to 210 °C.

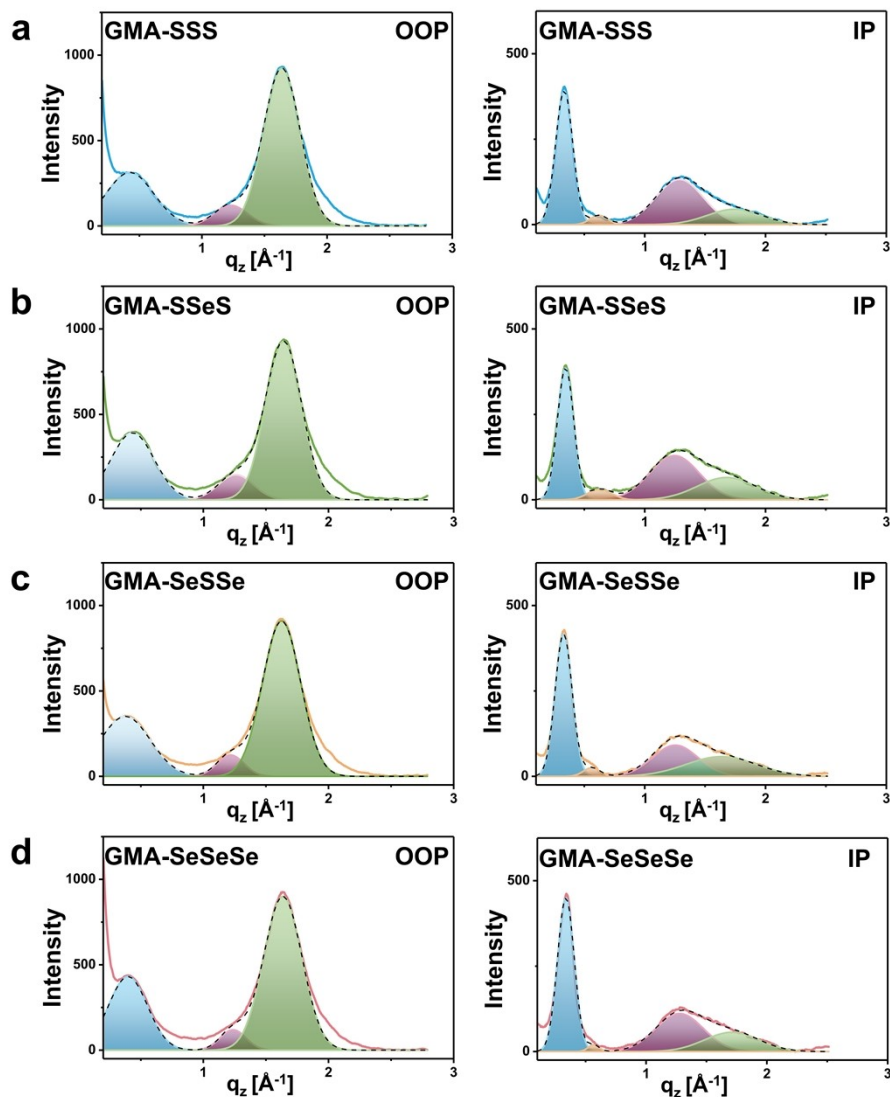

**Figure S26.** Peak fitting analysis of OOP and IP extracted line-cut profiles of the 2D GIWAXS patterns of four GMAs: (a) GMA-SSS, (b) GMA-SSeS, (c) GMA-SeSSe and (d) GMA-SeSeSe. Along the OOP direction, all neat GMAs films show lamellar stacking (100) and (300) diffraction peaks (blue and red shaded band, respectively), and pronounced  $\pi$ - $\pi$  stacking (010) diffraction peaks (green shaded band). Along the IP direction, all neat GMAs films show pronounced lamellar stacking (100), (200) and (400) diffraction peaks (blue, yellow and red shaded band, respectively), and  $\pi$ - $\pi$  stacking (010) diffraction peaks (green shaded band).

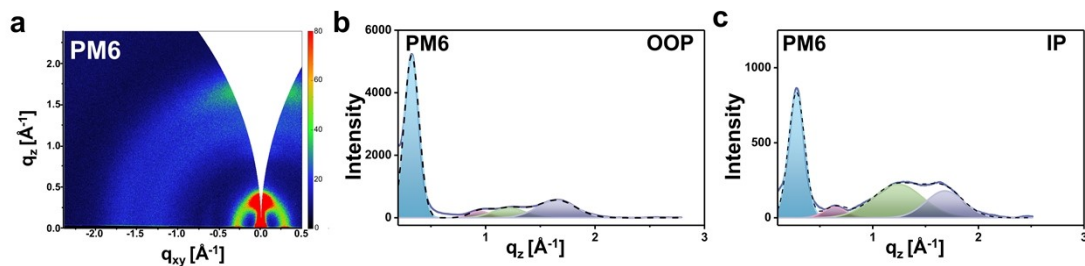

**Figure S27.** (a) 2D GIWAXS patterns, peak fitting analysis of (b) OOP and (c) IP extracted line-cut profiles of PM6. Along the OOP direction, neat PM6 film shows pronounced lamellar stacking (100), (300) and (400) diffraction peaks (blue, red and green shaded band, respectively), and  $\pi$ - $\pi$

stacking (010) diffraction peaks (purple shaded band). Along the IP direction, neat PM6 film shows pronounced lamellar stacking (100), (200) and (400) diffraction peaks (blue, red and green shaded band, respectively), and  $\pi$ - $\pi$  stacking (010) diffraction peaks (purple shaded band).

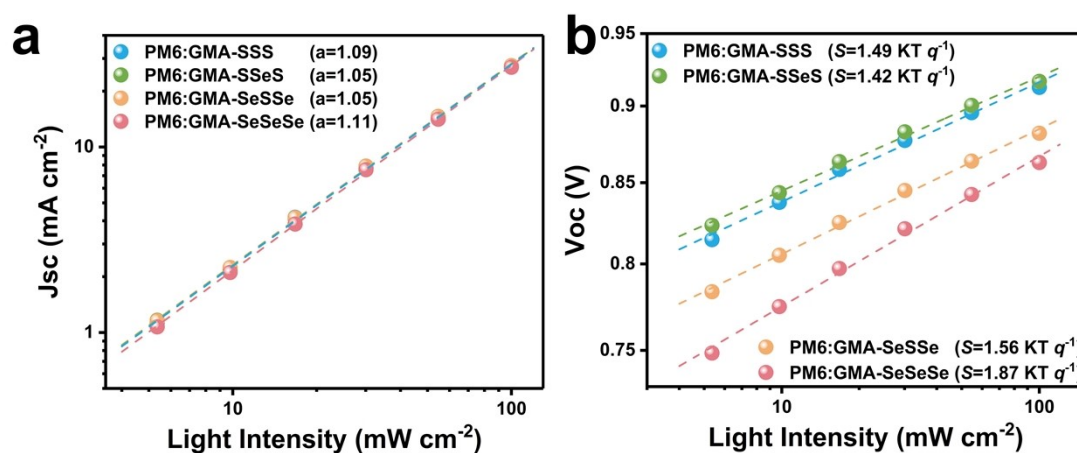

Figure S28. Light-intensity-dependent (a)  $J_{SC}$  and (b)  $V_{OC}$  plots of four PM6:GMAs-based devices.

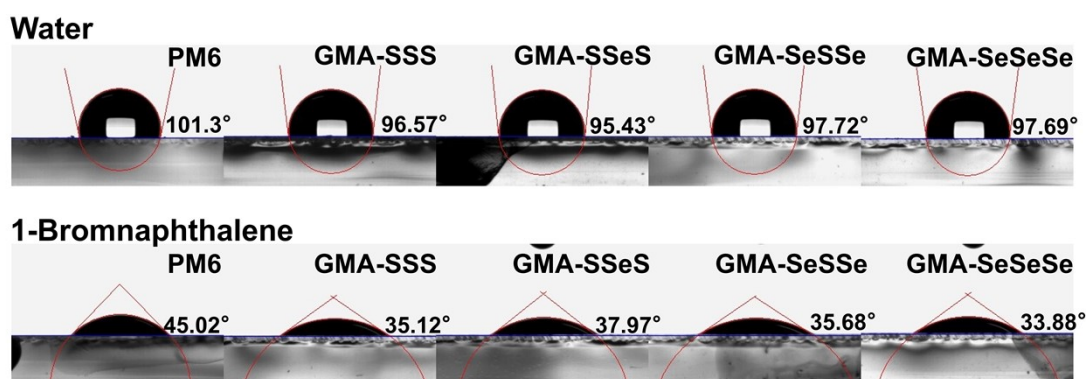

Figure S29. The contact angles of water and 1-Bromnaphthalene on the pristine films.

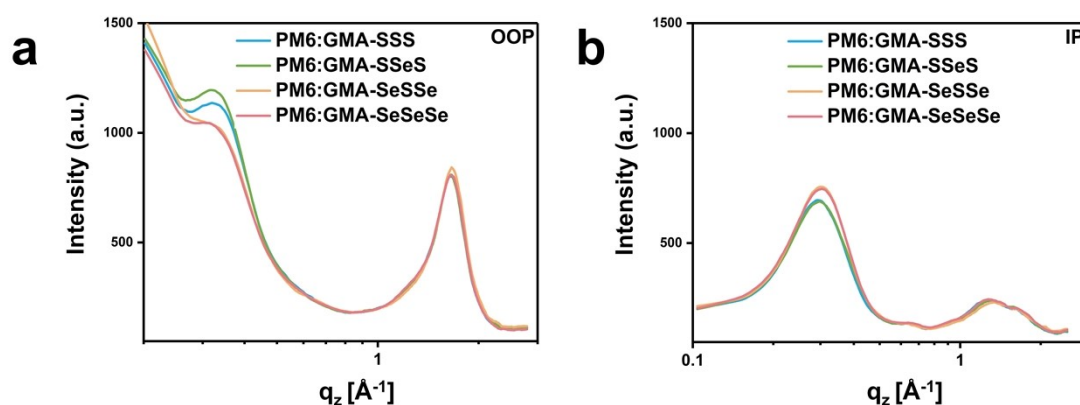

Figure S30. (a) OOP and (b) IP extracted line-cut profiles of the 2D GIWAXS patterns of four PM6:GMAs-based blends.

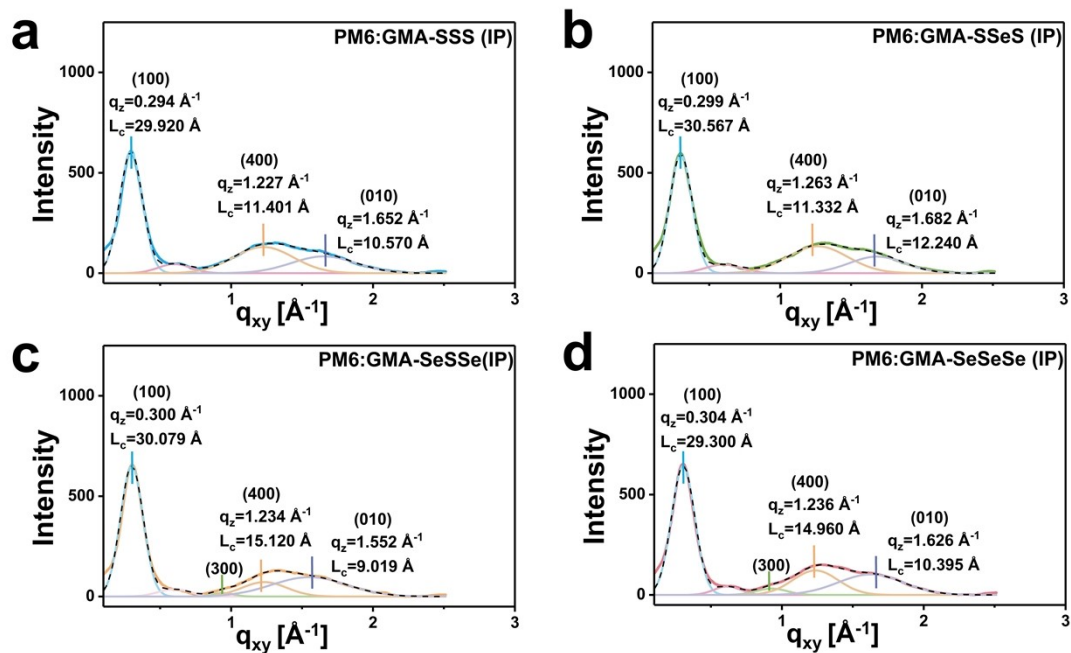

**Figure S31.** Peak fitting analysis of IP extracted line-cut profiles of the 2D GIWAXS patterns of four PM6:GMAs-based blends.

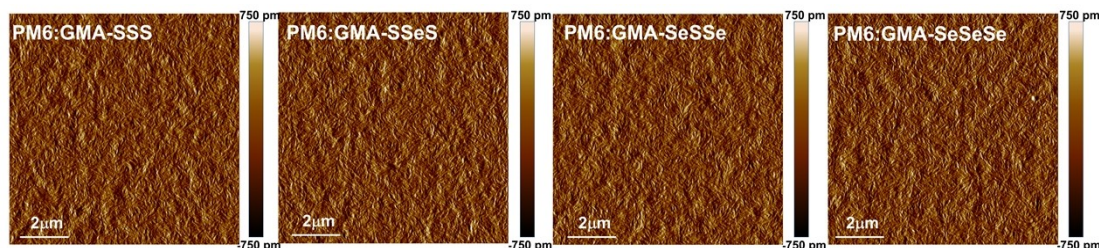

**Figure S32.** AFM phase images of four PM6:GMAs-based blends.

**Table S1.** GIWAXS characteristics of the neat PM6, GMA-SSS, GMA-SSeS, GMA-SeSSe and GMA-SeSeSe films.

|     | $q$ ( $\text{\AA}^{-1}$ ) | $d$ ( $\text{\AA}$ ) <sup>a</sup> | FWHM ( $\text{\AA}^{-1}$ ) | $L_c$ ( $\text{\AA}$ ) <sup>b</sup> |        |
|-----|---------------------------|-----------------------------------|----------------------------|-------------------------------------|--------|
| PM6 | OOP (100)                 | 0.324                             | 19.393                     | 0.161                               | 35.123 |
|     | OOP (300)                 | 0.948                             | 6.628                      | 0.221                               | 25.588 |
|     | OOP (400)                 | 1.211                             | 5.188                      | 0.347                               | 16.296 |
|     | OOP (010)                 | 1.648                             | 3.813                      | 0.412                               | 13.725 |
|     | IP (100)                  | 0.279                             | 22.520                     | 0.179                               | 31.591 |
|     | IP (200)                  | 0.641                             | 9.802                      | 0.249                               | 22.710 |
|     | IP (400)                  | 1.238                             | 5.075                      | 0.552                               | 10.244 |

|                   |           |       |        |       |        |
|-------------------|-----------|-------|--------|-------|--------|
|                   | IP (010)  | 1.682 | 3.736  | 0.421 | 13.432 |
|                   | OOP (100) | 0.423 | 14.854 | 0.449 | 12.594 |
|                   | OOP (300) | 1.231 | 5.104  | 0.314 | 18.009 |
|                   | OOP (010) | 1.639 | 3.834  | 0.345 | 16.391 |
| <b>GMA-SSS</b>    | IP (100)  | 0.333 | 18.868 | 0.168 | 33.660 |
|                   | IP (200)  | 0.620 | 10.134 | 0.170 | 33.264 |
|                   | IP (400)  | 1.287 | 4.882  | 0.462 | 12.240 |
|                   | IP (010)  | 1.742 | 3.607  | 0.528 | 10.710 |
|                   | OOP (100) | 0.434 | 14.477 | 0.408 | 13.860 |
|                   | OOP (300) | 1.260 | 4.987  | 0.329 | 17.188 |
|                   | OOP (010) | 1.641 | 3.829  | 0.340 | 16.632 |
| <b>GMA-SSeS</b>   | IP (100)  | 0.344 | 18.265 | 0.158 | 35.790 |
|                   | IP (200)  | 0.627 | 10.021 | 0.234 | 24.166 |
|                   | IP (400)  | 1.246 | 5.043  | 0.483 | 11.708 |
|                   | IP (010)  | 1.676 | 3.749  | 0.570 | 9.921  |
|                   | OOP (100) | 0.376 | 16.711 | 0.470 | 12.032 |
|                   | OOP (300) | 1.216 | 5.167  | 0.255 | 22.176 |
|                   | OOP (010) | 1.625 | 3.867  | 0.359 | 15.752 |
| <b>GMA-SeSSe</b>  | IP (100)  | 0.328 | 19.156 | 0.165 | 34.272 |
|                   | IP (200)  | 0.561 | 11.200 | 0.164 | 34.481 |
|                   | IP (400)  | 1.252 | 5.019  | 0.442 | 12.794 |
|                   | IP (010)  | 1.633 | 3.848  | 0.686 | 8.243  |
|                   | OOP (100) | 0.397 | 15.827 | 0.366 | 15.450 |
|                   | OOP (300) | 1.237 | 5.079  | 0.243 | 23.271 |
|                   | OOP (010) | 1.635 | 3.843  | 0.360 | 15.708 |
| <b>GMA-SeSeSe</b> | IP (100)  | 0.336 | 18.700 | 0.163 | 34.692 |
|                   | IP (200)  | 0.566 | 11.101 | 0.108 | 52.360 |
|                   | IP (400)  | 1.277 | 4.920  | 0.466 | 12.135 |
|                   | IP (010)  | 1.710 | 3.674  | 0.532 | 10.629 |

<sup>a</sup> The d-spacing estimated from the equation  $d=2\pi/q$ .

<sup>b</sup> The Coherent length estimated from the Scherrer's equation  $L_c= 2\pi k/\text{FWHM}$ , where k is a shape factor (here use 0.9).

**Table S2.** Detailed photovoltaic parameters of the PM6:GMA-SSS, PM6:GMA-SSeS, PM6:GMA-SeSSe and PM6:GMA-SeSeSe based devices by optimal conditions under illumination of AM 1.5 G, 100 mW cm<sup>-2</sup>.<sup>[a]</sup>

|                     | $V_{oc}$ [V]                 | $J_{sc}$ [mA cm <sup>-2</sup> ] | FF [%]       | PCE [%]      |
|---------------------|------------------------------|---------------------------------|--------------|--------------|
| <b>PM6:GMA-SSS</b>  | 0.910                        | 27.05                           | 75.47        | 18.58        |
|                     | 0.913                        | 27.13                           | 75.35        | 18.66        |
|                     | 0.914                        | 27.08                           | 75.25        | 18.63        |
|                     | 0.913                        | 27.12                           | 75.17        | 18.61        |
|                     | 0.912                        | 27.10                           | 75.01        | 18.54        |
|                     | 0.911                        | 27.05                           | 75.07        | 18.51        |
|                     | 0.911                        | 27.06                           | 75.02        | 18.49        |
|                     | 0.910                        | 26.98                           | 75.20        | 18.46        |
|                     | 0.910                        | 27.01                           | 74.95        | 18.42        |
|                     | 0.909                        | 27.01                           | 74.90        | 18.39        |
|                     | 0.909                        | 26.98                           | 74.92        | 18.37        |
|                     | 0.915                        | 26.65                           | 76.10        | 18.55        |
|                     | 0.913                        | 26.62                           | 76.05        | 18.49        |
|                     | 0.912                        | 26.56                           | 75.91        | 18.38        |
|                     | 0.911                        | 26.79                           | 75.62        | 18.45        |
|                     | <b>Average<sup>[b]</sup></b> | <b>0.911</b>                    | <b>26.93</b> | <b>75.36</b> |
| <b>PM6:GMA-SSeS</b> | 0.917                        | 27.38                           | 77.12        | 19.37        |
|                     | 0.917                        | 27.35                           | 77.04        | 19.32        |
|                     | 0.917                        | 27.36                           | 76.98        | 19.30        |
|                     | 0.915                        | 27.34                           | 76.96        | 19.26        |
|                     | 0.914                        | 27.36                           | 77.01        | 19.26        |
|                     | 0.914                        | 27.32                           | 76.99        | 19.22        |
|                     | 0.913                        | 27.35                           | 76.82        | 19.19        |
|                     | 0.913                        | 27.34                           | 76.87        | 19.19        |
|                     | 0.918                        | 27.40                           | 76.88        | 19.33        |
|                     | 0.917                        | 27.44                           | 76.83        | 19.34        |
|                     | 0.917                        | 27.41                           | 76.73        | 19.28        |
|                     | 0.916                        | 27.43                           | 76.76        | 19.29        |
|                     | 0.916                        | 27.32                           | 76.80        | 19.21        |
|                     | 0.920                        | 27.23                           | 77.03        | 19.30        |
|                     | 0.919                        | 27.16                           | 76.99        | 19.21        |
|                     | 0.917                        | 27.17                           | 76.88        | 19.17        |

| Average <sup>[b]</sup>       | <b>0.916</b> | <b>27.34</b>                    | <b>76.92</b> | <b>19.26</b> |
|------------------------------|--------------|---------------------------------|--------------|--------------|
|                              | $V_{oc}$ [V] | $J_{sc}$ [mA cm <sup>-2</sup> ] | FF [%]       | PCE [%]      |
|                              | 0.878        | 27.46                           | 74.36        | 17.92        |
|                              | 0.877        | 27.46                           | 74.07        | 17.83        |
|                              | 0.880        | 27.33                           | 75.10        | 18.06        |
|                              | 0.879        | 27.37                           | 74.61        | 17.95        |
|                              | 0.880        | 27.95                           | 73.25        | 18.02        |
|                              | 0.881        | 27.99                           | 73.34        | 18.09        |
| <b>PM6:GMA-<br/>SeSSe</b>    | 0.880        | 27.93                           | 73.43        | 18.05        |
|                              | 0.879        | 27.95                           | 73.05        | 17.95        |
|                              | 0.877        | 27.99                           | 73.11        | 17.96        |
|                              | 0.882        | 27.47                           | 74.99        | 18.17        |
|                              | 0.881        | 27.48                           | 74.79        | 18.11        |
|                              | 0.880        | 27.49                           | 74.72        | 18.08        |
|                              | 0.879        | 27.44                           | 74.88        | 18.07        |
|                              | 0.879        | 27.48                           | 74.72        | 18.04        |
|                              | 0.878        | 27.44                           | 74.71        | 18.01        |
|                              | 0.878        | 27.48                           | 74.61        | 18.00        |
| <b>Average<sup>[b]</sup></b> | <b>0.882</b> | <b>27.61</b>                    | <b>74.23</b> | <b>18.02</b> |
|                              | $V_{oc}$ [V] | $J_{sc}$ [mA cm <sup>-2</sup> ] | FF [%]       | PCE [%]      |
|                              | 0.868        | 26.30                           | 71.60        | 16.34        |
|                              | 0.866        | 26.32                           | 71.49        | 16.30        |
|                              | 0.865        | 26.29                           | 71.68        | 16.31        |
|                              | 0.864        | 26.88                           | 70.97        | 16.48        |
|                              | 0.863        | 26.88                           | 71.04        | 16.48        |
|                              | 0.862        | 26.90                           | 70.63        | 16.39        |
| <b>PM6:GMA-<br/>SeSeSe</b>   | 0.863        | 26.90                           | 70.75        | 16.42        |
|                              | 0.865        | 26.91                           | 70.83        | 16.49        |
|                              | 0.864        | 26.85                           | 70.53        | 16.36        |
|                              | 0.863        | 26.90                           | 70.50        | 16.37        |
|                              | 0.863        | 26.86                           | 70.70        | 16.38        |
|                              | 0.862        | 26.84                           | 70.40        | 16.29        |
|                              | 0.866        | 26.83                           | 70.52        | 16.38        |
|                              | 0.864        | 26.78                           | 70.56        | 16.32        |
|                              | 0.863        | 26.77                           | 70.53        | 16.29        |
|                              | 0.863        | 26.81                           | 70.31        | 16.27        |
| <b>Average<sup>[b]</sup></b> | <b>0.864</b> | <b>26.75</b>                    | <b>70.83</b> | <b>16.37</b> |

<sup>[a]</sup>The device architecture is ITO/2PACz/ PM6:GMAs (1:1) /PDINN/Ag, PM6 is 7 mg/mL in chloroform with 0.75 vol% CN, the resulting solutions are spin-casted at 3000 rpm onto the 2PACz layer, TA (95 °C for 10 min).

<sup>[b]</sup> The average values are obtained from 16 independent devices.

**Table S3.** Photovoltaic parameters of PM6:GMAs-based OSCs under AM 1.5G irradiation (100 mW cm<sup>-2</sup>) when employing PEDOT:PSS as hole transport layer.

| GMAs       | $V_{oc}$ [V] | $J_{sc}$ [mA cm <sup>-2</sup> ] | FF [%] | PCE [%] |
|------------|--------------|---------------------------------|--------|---------|
| GMA-SSS    | 0.911        | 26.07                           | 74.74  | 17.76   |
| GMA-SSeS   | 0.912        | 26.86                           | 76.06  | 18.64   |
| GMA-SeSSe  | 0.876        | 27.27                           | 72.29  | 17.28   |
| GMA-SeSeSe | 0.865        | 25.38                           | 71.68  | 15.74   |

**Table S4.** Detailed photovoltaic parameters of GMAs-based binary BHJ OSCs reported in recent years.

| Acceptor                   | Donor      | $V_{oc}$ [V] | $J_{sc}$ [mA cm <sup>-2</sup> ] | FF [%] | PCE [%] | Energy Loss [eV] | Device stability (Stability condition) | Ref. |
|----------------------------|------------|--------------|---------------------------------|--------|---------|------------------|----------------------------------------|------|
| OY2                        | PBD<br>B-T | 0.837        | 24.37                           | 71.79  | 14.69   |                  |                                        | [3]  |
| OY3                        |            | 0.839        | 23.76                           | 74.58  | 14.87   |                  | $t_{80\%}$ ~25000 h (1sun)             |      |
| OY4                        |            | 0.814        | 24.39                           | 74.69  | 14.82   |                  |                                        |      |
| QM1                        | PM6        | 0.91         | 25.23                           | 74.01  | 17.05   | 0.54             | $t_{90\%}$ ~1400 h (1 sun)             | [4]  |
| QM2                        |            | 0.91         | 25.42                           | 70.50  | 16.36   | 0.53             |                                        |      |
| <i>d</i> BTIC $\gamma$ -EH | PM6        | 0.92         | 21.43                           | 73.28  | 14.48   |                  | $t_{80\%}$ ~1020 h (1 sun)             | [5]  |
| <i>d</i> BTIC $\gamma$ -BO |            | 0.91         | 20.97                           | 70.26  | 13.42   |                  | $t_{80\%}$ ~840 h (1 sun)              |      |
| <i>t</i> BTIC $\gamma$ -EH |            | 0.90         | 21.25                           | 68.76  | 13.16   |                  | $t_{80\%}$ ~840 h (1 sun)              |      |
| 2BTP-2F-T                  | PM6        | 0.911        | 25.50                           | 78.28  | 18.19   | 0.52             | $t_{80\%}$ ~443 h (1 sun)              | [6]  |
| TDY- $\alpha$              | PM6        | 0.864        | 26.9                            | 78.0   | 18.1    |                  | $t_{80\%}$ ~34747 h (1 sun)            | [7]  |
| TDY- $\beta$               |            | 0.849        | 26.1                            | 76.6   | 17.0    |                  | $t_{80\%}$ ~31000 h (1 sun)            |      |
| CH8-0                      | PM6        | 0.936        | 22.61                           | 72.1   | 15.26   | 0.490            | $t_{78\%}$ ~360 h (65 °C)              | [8]  |
| CH8-1                      |            | 0.923        | 24.89                           | 74.2   | 17.05   | 0.518            | $t_{85\%}$ ~200 h (1 sun)              |      |
| CH8-2                      |            | 0.928        | 24.24                           | 74.9   | 16.84   | 0.529            | $t_{85\%}$ ~360 h (65 °C)              |      |
| CH8-3                      |            | 0.915        | 24.44                           | 77.0   | 17.22   | 0.529            | $t_{80\%}$ ~250 h (65 °C)              |      |
| CH8-4                      |            | 0.894        | 26.05                           | 75.5   | 17.58   | 0.515            | $t_{80\%}$ ~250 h (65 °C)              |      |
| CH8-5                      |            | 0.902        | 24.75                           | 75.2   | 16.79   | 0.520            | $t_{80\%}$ ~250 h (65 °C)              |      |
| DYV                        | PM6        | 0.910        | 25.972                          | 76.215 | 18.013  |                  | $t_{80\%}$ ~700 h (1 sun)              | [10] |
| DYVC                       |            | 0.915        | 24.874                          | 73.857 | 16.809  |                  |                                        |      |
| DYTVT                      |            | 0.935        | 22.903                          | 68.145 | 14.593  |                  |                                        |      |



|                            |                   |       |        |        |        |       |                                     |
|----------------------------|-------------------|-------|--------|--------|--------|-------|-------------------------------------|
| DYB                        |                   | 0.939 | 20.509 | 67.415 | 12.983 |       |                                     |
| DYID                       |                   | 0.913 | 12.901 | 46.995 | 5.534  |       |                                     |
| DITV                       |                   | 0.937 | 20.394 | 72.571 | 13.643 |       |                                     |
| DITID                      |                   | 0.935 | 13.927 | 52.458 | 6.831  |       |                                     |
| DYC6                       |                   | 0.936 | 18.751 | 67.724 | 11.838 |       |                                     |
| DYC8                       |                   | 0.947 | 20.467 | 68.449 | 13.267 |       |                                     |
| DYC10                      |                   | 0.947 | 22.277 | 68.656 | 14.484 |       | $t_{77\%}\sim 700$ h (1 sun)        |
| DYSe-I                     | PM6               | 0.94  | 23.5   | 74.00  | 16.8   |       | $t_{80\%}\sim 514$ h (100 °C) [11]  |
| DYSe-O                     |                   | 0.95  | 19.7   | 79.00  | 14.0   |       | $t_{80\%}\sim 115$ h (100 °C)       |
| DYT                        | PM6               | 0.94  | 24.08  | 76.00  | 17.30  |       | $t_{80\%}\sim 2493$ h (1 sun) [12]  |
| DYV                        |                   | 0.93  | 25.64  | 78.00  | 18.60  |       | $t_{80\%}\sim 4005$ h (1 sun)       |
| DYTVT                      |                   | 0.95  | 24.82  | 74.00  | 17.68  |       | $t_{80\%}\sim 5419$ h (1 sun)       |
| DYT                        | PM6               | 0.942 | 24.89  | 74.00  | 17.29  | 0.503 | $t_{80\%}\sim 2551$ h (1 sun) [13]  |
| TYT                        |                   | 0.964 | 25.07  | 75.00  | 18.15  | 0.492 | $t_{80\%}\sim 8454$ h (1 sun)       |
| DY1                        |                   | 0.87  | 25.67  | 73.24  | 16.46  |       |                                     |
| DY2                        | PM6               | 0.87  | 26.60  | 76.85  | 17.85  | 0.580 | $t_{83\%}\sim 700$ h (1 sun) [14]   |
| DY3                        |                   | 0.87  | 26.20  | 76.21  | 17.33  |       |                                     |
| CH-D1                      | PM6               | 0.949 | 23.90  | 73.20  | 16.62  |       | [15]                                |
| DYBO                       | PM6               | 0.968 | 24.623 | 75.800 | 18.082 | 0.484 | $t_{80\%}\sim 6085$ h (1 sun) [16]  |
| DYA-I                      |                   | 0.938 | 25.67  | 78.00  | 18.83  |       | $t_{80\%}\sim 5380$ h (1 sun)       |
| DYA-IO                     | D18               | 0.948 | 24.29  | 76.00  | 17.54  |       | $t_{80\%}\sim 4255$ h (1 sun) [17]  |
| DYA-O                      |                   | 0.961 | 23.32  | 73.00  | 16.45  |       | $t_{80\%}\sim 3337$ h (1 sun)       |
| dB TIC- $\delta$ V-BO      | PBQ<br>x-H-<br>TF | 0.96  | 20.67  | 66.06  | 13.15  | 0.578 | $t_{80\%}\sim 750$ h (1 sun)        |
| dB TIC- $\gamma$ V-BO      |                   | 0.91  | 24.52  | 76.58  | 17.14  | 0.557 | $t_{80\%}\sim 2150$ h (1 sun) [18]  |
| dB TIC- $\gamma$ V-OD-2Cl  |                   | 0.87  | 24.65  | 74.71  | 16.04  | 0.566 | $t_{80\%}\sim 1100$ h (1 sun)       |
| G-Dimer                    |                   | 0.904 | 24.39  | 78.95  | 17.41  |       | $t_{80\%}\sim 4500$ h (80 °C)       |
| G-Timer-C6C8               | PM6               | 0.899 | 25.32  | 79.34  | 18.07  |       |                                     |
| G-Timer-C8C10 <sup>a</sup> |                   | 0.911 | 25.40  | 79.49  | 18.39  |       | $t_{90\%}\sim 4500$ h (80 °C) [19]  |
| G-Timer-C8C10 <sup>b</sup> |                   | 0.896 | 26.75  | 79.30  | 19.01  |       | $t_{90\%}\sim 4500$ h (80 °C)       |
| DIBP3F-Se                  | PM6               | 0.917 | 25.92  | 76.10  | 18.09  | 0.509 | $t_{80\%}\sim 22$ days (85 °C) [20] |
| DIBP3F-S                   |                   | 0.901 | 24.86  | 72.00  | 16.11  | 0.527 | $t_{80\%}\sim 13$ days (85 °C)      |
| Tri-Y6-OD                  | PM6               | 0.916 | 25.30  | 77.8   | 18.03  |       | $t_{80\%}\sim 1523$ h (1 sun) [21]  |

|               |     |       |       |       |       |                                |                              |      |
|---------------|-----|-------|-------|-------|-------|--------------------------------|------------------------------|------|
| Tri-DT        |     | 0.943 | 23.89 | 77.4  | 17.44 |                                |                              |      |
| BT-BTz-<br>BT |     | 0.928 | 23.61 | 74.3  | 16.28 |                                |                              |      |
| BO-C11-<br>BO |     | 0.951 | 21.05 | 73.4  | 14.69 |                                |                              |      |
| EV-i          | PM6 | 0.897 | 26.60 | 76.56 | 18.27 | $t_{90\%}\sim 800$ h (1 sun)   | [22]                         |      |
| EV-o          |     | 0.957 | 6.20  | 42.13 | 2.50  |                                |                              |      |
| DY            |     | 0.959 | 22.01 | 70.50 | 14.88 | $t_{94\%}\sim 12$ h (90 °C)    |                              |      |
| TY            | PM6 | 0.953 | 23.35 | 73.36 | 16.32 | $t_{96\%}\sim 12$ h (90 °C)    | [23]                         |      |
| QY            |     | 0.937 | 23.20 | 71.15 | 15.47 | $t_{97\%}\sim 12$ h (90 °C)    |                              |      |
| DYSe-1        | PM6 | 0.885 | 27.51 | 76.6  | 18.56 | 0.520                          | $t_{80\%}\sim 500$ h (65 °C) | [24] |
| DYSe-2        |     | 0.884 | 27.45 | 75.2  | 18.22 | 0.522                          | $t_{80\%}\sim 500$ h (65 °C) |      |
| BDY- $\alpha$ |     | 0.869 | 26.09 | 76.68 | 17.38 | $t_{90\%}\sim 1200$ h (85 °C)  |                              |      |
| BDY- $\beta$  | PM6 | 0.881 | 26.49 | 77.67 | 18.12 | $t_{93\%}\sim 1200$ h (85 °C)  | [25]                         |      |
| BTY           |     | 0.864 | 27.06 | 78.01 | 18.24 | $t_{95\%}\sim 1200$ h (85 °C)  |                              |      |
| HDY-m-<br>TAT |     | 0.915 | 23.33 | 67.8  | 14.42 |                                |                              |      |
| FDY-m-<br>TAT | PM6 | 0.911 | 26.47 | 74.7  | 18.07 |                                | [26]                         |      |
| HDY-o-<br>TAT |     | 0.933 | 23.07 | 70.7  | 15.23 |                                |                              |      |
| FDY-o-<br>TAT |     | 0.914 | 25.14 | 73.6  | 16.91 |                                |                              |      |
| DYT           |     | 0.948 | 24.16 | 75.00 | 17.20 | $t_{80\%}\sim 2157$ h (1 sun)  |                              |      |
| TYT-L         | D18 | 0.968 | 24.19 | 75.00 | 17.47 |                                | [27]                         |      |
| TYT-S         |     | 0.964 | 25.18 | 77.00 | 18.61 | $t_{80\%}\sim 2604$ h (1 sun)  |                              |      |
| DP-BTP        | D18 | 0.96  | 22.73 | 69.10 | 15.08 | 0.42                           | [28]                         |      |
| Dimer-Qx      | PM6 | 0.933 | 22.57 | 69.26 | 14.59 | $t_{80\%}\sim 11261$ h (80 °C) | [29]                         |      |
| Dimer-2CF     |     | 0.900 | 26.39 | 80.03 | 19.02 | $t_{80\%}\sim 11983$ h (80 °C) |                              |      |
| DYV           | D18 | 0.915 | 24.90 | 75.20 | 17.38 | $t_{80\%}\sim 24000$ h (1 sun) | [30]                         |      |
| DYFV          |     | 0.897 | 25.50 | 77.40 | 17.88 | $t_{80\%}\sim 45000$ h (1 sun) |                              |      |
| 2Y-wing       |     | 0.850 | 27.66 | 75.4  | 17.73 | $t_{90\%}\sim 200$ h (80 °C)   |                              |      |
| 2Y-core       | D18 | 0.864 | 10.58 | 61.5  | 5.63  | $t_{67\%}\sim 200$ h (80 °C)   | [31]                         |      |
| 2Y-end        |     | 0.948 | 22.39 | 68.5  | 14.46 | $t_{32\%}\sim 200$ h (80 °C)   |                              |      |
| Tet-0         |     | 0.914 | 23.95 | 76.0  | 16.63 | $t_{80\%}\sim 1436$ h (1 sun)  |                              |      |
| Tet-1         | PM6 | 0.919 | 24.53 | 76.8  | 17.32 | $t_{80\%}\sim 1706$ h (1 sun)  | [32]                         |      |
| Tet-3         |     | 0.921 | 24.21 | 75.9  | 16.92 | $t_{80\%}\sim 1546$ h (1 sun)  |                              |      |
| DY-P2EH       | PM6 | 0.905 | 24.03 | 78.58 | 17.09 | $t_{80\%}\sim 1100$ h (85 °C)  | [33]                         |      |

|        |     |      |       |      |       |                                    |
|--------|-----|------|-------|------|-------|------------------------------------|
| DYTVT  | D18 | 0.97 | 24.13 | 74.0 | 17.39 |                                    |
| DYTCVT |     | 0.94 | 23.66 | 76.0 | 16.96 | $t_{80\%}\sim 2910$ h (1 sun) [34] |

<sup>a</sup> PEDOT:PSS as the hole transport layer.

<sup>b</sup> 2PACz as the hole transport layer.

**Table S5.** Summary of contact angles ( $\theta$ ), surface tensions ( $\gamma$ ), and Flory–Huggins interaction parameters ( $\chi$ ) for PM6 and four GMAs films.

| Surface    | $\theta_{\text{water}}(^{\circ})^a$ | $\theta_{1\text{-Bromnaphthalene}}(^{\circ})^a$ | $\gamma$ (mN m <sup>-1</sup> ) | $\chi^{\text{D-A}^b}$ |
|------------|-------------------------------------|-------------------------------------------------|--------------------------------|-----------------------|
| PM6        | 101.30                              | 45.02                                           | 32.62                          | -                     |
| GMA-SSS    | 96.57                               | 35.12                                           | 37.15                          | 0.149                 |
| GMA-SSeS   | 95.43                               | 37.97                                           | 36.16                          | 0.091                 |
| GMA-SeSSe  | 97.72                               | 35.68                                           | 36.83                          | 0.127                 |
| GMA-SeSeSe | 97.69                               | 33.88                                           | 37.53                          | 0.174                 |

<sup>a</sup>) Average  $\theta_{\text{water}}$  and  $\theta_{1\text{-Bromnaphthalene}}$  values were obtained from 5 individual measurements.

<sup>b</sup>) The Flory–Huggins interaction parameter between the donor (D) and acceptor (A) is calculated through the equation of  $\chi = (\gamma_{\text{D}}^{1/2} - \gamma_{\text{A}}^{1/2})^2$ .

**Table S6.** GIWAXS characteristics of four blend films, PM6:GMA-SSS, PM6:GMA-SSeS, PM6:GMA-SeSSe and PM6:GMA-SeSeSe.

|              | adsorption | $q$ ( $\text{\AA}^{-1}$ ) | $d$ ( $\text{\AA}$ ) <sup>a</sup> | FWHM ( $\text{\AA}^{-1}$ ) | $L_c$ ( $\text{\AA}$ ) <sup>b</sup> |        |
|--------------|------------|---------------------------|-----------------------------------|----------------------------|-------------------------------------|--------|
| PM6:GMA-SSS  | OOP (100)  | D/A                       | 0.316                             | 19.883                     | 0.245                               | 23.081 |
|              | OOP (200)  | D/A                       | 0.614                             | 10.233                     |                                     |        |
|              | OOP (300)  | D                         | 0.939                             | 6.691                      |                                     |        |
|              | OOP (400)  | D/A                       | 1.247                             | 5.039                      |                                     |        |
|              | OOP (010)  | D/A                       | 1.650                             | 3.808                      | 0.399                               | 14.173 |
|              | IP (100)   | D/A                       | 0.294                             | 21.371                     | 0.189                               | 29.920 |
|              | IP (200)   | D/A                       | 0.601                             | 10.455                     |                                     |        |
|              | IP (400)   | D/A                       | 1.227                             | 5.121                      | 0.496                               | 11.401 |
|              | IP (010)   | D/A                       | 1.652                             | 3.803                      | 0.535                               | 10.570 |
| PM6:GMA-SSeS | OOP (100)  | D/A                       | 0.316                             | 19.883                     | 0.237                               | 23.860 |
|              | OOP (200)  | D/A                       | 0.614                             | 10.233                     |                                     |        |
|              | OOP (300)  | D                         | 0.919                             | 6.837                      |                                     |        |

|                 |           |     |       |        |       |        |
|-----------------|-----------|-----|-------|--------|-------|--------|
|                 | OOP (400) | D/A | 1.263 | 4.975  |       |        |
|                 | OOP (010) | D/A | 1.657 | 3.792  | 0.376 | 15.040 |
|                 | IP (100)  | D/A | 0.299 | 21.014 | 0.185 | 30.567 |
|                 | IP (200)  | D/A | 0.601 | 10.455 |       |        |
|                 | IP (400)  | D/A | 1.264 | 4.971  | 0.499 | 11.332 |
|                 | IP (010)  | D/A | 1.682 | 3.736  | 0.426 | 13.274 |
|                 | OOP (100) | D/A | 0.286 | 21.969 | 0.297 | 19.040 |
|                 | OOP (200) | D/A | 0.611 | 10.283 |       |        |
|                 | OOP (300) | D   | 0.932 | 6.742  |       |        |
|                 | OOP (400) | D/A | 1.273 | 4.936  |       |        |
| <b>PM6:GMA-</b> | OOP (010) | D/A | 1.661 | 3.783  | 0.390 | 14.500 |
| <b>SeSSe</b>    | IP (100)  | D/A | 0.300 | 20.944 | 0.188 | 30.079 |
|                 | IP (200)  | D/A | 0.598 | 10.507 |       |        |
|                 | IP (300)  | D   | 0.942 | 6.670  |       |        |
|                 | IP (400)  | D/A | 1.234 | 5.092  | 0.373 | 15.161 |
|                 | IP (010)  | D/A | 1.552 | 4.048  | 0.627 | 9.019  |
|                 | OOP (100) | D/A | 0.299 | 21.014 | 0.279 | 20.268 |
|                 | OOP (200) | D/A | 0.612 | 10.267 |       |        |
|                 | OOP (300) | D   | 0.934 | 6.727  |       |        |
|                 | OOP (400) | D/A | 1.262 | 4.979  |       |        |
| <b>PM6:GMA-</b> | OOP (010) | D/A | 1.653 | 3.801  | 0.400 | 14.137 |
| <b>SeSeSe</b>   | IP (100)  | D/A | 0.304 | 20.668 | 0.193 | 29.300 |
|                 | IP (200)  | D/A | 0.615 | 10.217 |       |        |
|                 | IP (300)  | D   | 0.927 | 6.778  |       |        |
|                 | IP (400)  | D/A | 1.236 | 5.083  | 0.378 | 14.960 |
|                 | IP (010)  | D/A | 1.626 | 3.864  | 0.544 | 10.395 |

<sup>a</sup> The d-spacing estimated from the equation  $d=2\pi/q$ .

<sup>b</sup> The Coherent length estimated from the Scherrer's equation  $L_c= 2\pi k/\text{FWHM}$ , where k is a shape factor (here use 0.9).

**Table S7.** Voltage loss parameters of PM6:GMAs-based OSCs.

|                | $E_g$ [eV] <sup>a</sup> | $qV_{OC}^{SQ}$ [eV] | $qV_{OC}^{rad}$ [eV] | $\Delta E_1$ [eV] <sup>b</sup> | $\Delta E_2$ [eV] <sup>c</sup> | $\Delta E_3$ [eV] <sup>d</sup> | $E_{loss}$ [eV] <sup>e</sup> |
|----------------|-------------------------|---------------------|----------------------|--------------------------------|--------------------------------|--------------------------------|------------------------------|
| PM6:GMA-SSS    | 1.448                   | 1.184               | 1.111                | 0.264                          | 0.072                          | 0.267                          | 0.603                        |
| PM6:GMA-SSeS   | 1.446                   | 1.182               | 1.119                | 0.264                          | 0.064                          | 0.246                          | 0.573                        |
| PM6:GMA-SeSSe  | 1.420                   | 1.157               | 1.095                | 0.262                          | 0.062                          | 0.268                          | 0.592                        |
| PM6:GMA-SeSeSe | 1.420                   | 1.157               | 1.095                | 0.262                          | 0.063                          | 0.280                          | 0.605                        |

<sup>a</sup>)  $E_g$  is obtained from the derivative of the EQE edges.

<sup>b</sup>)  $\Delta E_1 = E_g - qV_{OC}^{SQ}$ .

<sup>c</sup>)  $\Delta E_2 = qV_{OC}^{SQ} - qV_{OC}^{rad}$ .

<sup>d</sup>)  $\Delta E_3 = -kT \ln(EQE_{EL})$ .

<sup>e</sup>)  $E_{loss} = \Delta E_1 + \Delta E_2 + \Delta E_3$

- [1] S. E. Root, M. A. Alkhadra, D. Rodriguez, A. D. Printz, D. J. Lipomi, *Chem. Mater.* **2017**, *29*, 2646-2654.
- [2] M. Ghasemi, N. Balar, Z. Peng, H. Hu, Y. Qin, T. Kim, J. J. Rech, M. Bidwell, W. Mask, I. McCulloch, W. You, A. Amassian, C. Risko, B. T. O'Connor, H. Ade, *Nat. Mater.* **2021**, *20*, 525-532.
- [3] Y. liang, D. Zhang, Z. Wu, T. Jia, I. I, H. Tang, L. Hong, K. Zhang, J. B. C, L. N, H. F, *Nat. Energy* **2022**, *7*, 1180–1190.
- [4] W. Liu, J. Yuan, C. Zhu, Q. Wei, S. Liang, H. Zhang, G. Zheng, Y. Hu, L. Meng, F. Gao, Y. Li, Y. Zou, *SCI CHINA CHEM* **2022**, *65*, 1374-1382.
- [5] H. Wang, C. Cao, H. Chen, H. Lai, C. Ke, Y. Zhu, H. Li, F. He, *Angew. Chem. Int. Ed. Engl.* **2022**, *61*, e202201844.
- [6] L. Zhang, Z. Zhang, D. Deng, H. Zhou, J. Zhang, Z. Wei, *Adv. Sci.* **2022**, *9*, 2202513.
- [7] Y. Bai, Z. Zhang, Q. Zhou, H. Geng, Q. Chen, S. Kim, R. Zhang, C. Zhang, B. Chang, S. Li, H. Fu, L. Xue, H. Wang, W. Li, W. Chen, M. Gao, L. Ye, Y. Zhou, Y. Ouyang, C. Zhang, F. Gao, C. Yang, Y. Li, Z. G. Zhang, *Nat. Commun.* **2023**, *14*, 2926.
- [8] H. Chen, Z. Zhang, P. Wang, Y. Zhang, K. Ma, Y. Lin, T. Duan, T. He, Z. Ma, G. Long, C. Li, B. Kan, Z. Yao, X. Wan, Y. Chen, *Energy Environ. Sci.* **2023**, *16*, 1773.
- [9] H. Chen, B. Kan, P. Wang, W. Feng, L. Li, S. Zhang, T. Chen, Y. Yang, T. Duan, Z. Yao, C. Li, X. Wan, Y. Chen, *Angew. Chem. Int. Ed. Engl.* **2023**, *62*, e202307962.
- [10] H. Fu, M. Zhang, Y. Zhang, Q. Wang, Z. Xu, Q. Zhou, Z. Li, Y. Bai, Y. Li, Z. G. Zhang, *Angew. Chem. Int. Ed. Engl.* **2023**, *62*, e202306303.
- [11] H. Jeon, K.-p. Hong, J.-W. Lee, D. Jeong, T. N.-L. Phan, H.-G. Lee, J. S. Park, C. Wang, S. Xuyao, Y.-H. Kim, B. J. Kim, *Chem. Mater.* **2023**, *35*, 9276-9286.
- [12] J.-W. Lee, C. Sun, C. Lee, Z. Tan, T. N.-L. Phan, H. Jeon, D. Jeong, S.-K. Kwon, Y.-H. Kim, B. J. Kim, *ACS Energy Lett.* **2023**, *8*, 1344-1353.
- [13] J.-W. Lee, C. Sun, T. N.-L. Phan, D. C. Lee, Z. Tan, H. Jeon, S. Cho, S.-K. Kwon, Y.-H. Kim, B. J. Kim, *Energy Environ. Sci.* **2023**, *16*, 3339-3349.
- [14] S. Li, R. Zhang, M. Zhang, J. Yao, Z. Peng, Q. Chen, C. Zhang, B. Chang, Y. Bai, H. Fu, Y.

- Ouyang, C. Zhang, J. A. Steele, T. Alshahrani, M. B. J. Roeffaers, E. Solano, L. Meng, F. Gao, Y. Li, Z. G. Zhang, *Adv. Mater.* **2023**, *35*, 2206563.
- [15] Z. Li, Z. Zhang, H. Chen, Y. Zhang, Y. Q. Q. Yi, Z. Liang, B. Zhao, M. Li, C. Li, Z. Yao, X. Wan, B. Kan, Y. Chen, *Adv. Energy Mater.* **2023**, *13*, 2300301.
- [16] C. Sun, J.-W. Lee, C. Lee, D. Lee, S. Cho, S.-K. Kwon, B. J. Kim, Y.-H. Kim, *Joule* **2023**, *7*, 416-430.
- [17] C. Sun, J. W. Lee, Z. Tan, T. N. L. Phan, D. Han, H. G. Lee, S. Lee, S. K. Kwon, B. J. Kim, Y. H. Kim, *Adv. Energy Mater.* **2023**, *13*, 2301283.
- [18] P. Tan, H. Chen, H. Wang, X. Lai, Y. Zhu, X. Shen, M. Pu, H. Lai, S. Zhang, W. Ma, F. He, *Adv. Funct. Mater.* **2023**, *34*, 2305608.
- [19] C. Wang, X. Ma, Y.-f. Shen, D. Deng, H. Zhang, T. Wang, J. Zhang, J. Li, R. Wang, L. Zhang, Q. Cheng, Z. Zhang, H. Zhou, C. Tian, Z. Wei, *Joule* **2023**, *7*, 2386-2401.
- [20] J. Wu, Z. Ling, L. R. Franco, S. Y. Jeong, Z. Genene, J. Mena, S. Chen, C. Chen, C. M. Araujo, C. F. N. Marchiori, J. Kimpel, X. Chang, F. H. Isikgor, Q. Chen, H. Faber, Y. Han, F. Laquai, M. Zhang, H. Y. Woo, D. Yu, T. D. Anthopoulos, E. Wang, *Angew. Chem. Int. Ed. Engl.* **2023**, *62*, e202302888.
- [21] C. Zhang, J. Song, J. Xue, S. Wang, Z. Ge, Y. Man, W. Ma, Y. Sun, *Angew. Chem. Int. Ed. Engl.* **2023**, *62*, e202308595.
- [22] H. Zhuo, X. Li, J. Zhang, S. Qin, J. Guo, R. Zhou, X. Jiang, X. Wu, Z. Chen, J. Li, L. Meng, Y. Li, *Angew. Chem. Int. Ed. Engl.* **2023**, *62*, e202303551.
- [23] H. Zhuo, X. Li, J. Zhang, C. Zhu, H. He, K. Ding, J. Li, L. Meng, H. Ade, Y. Li, *Nat. Commun.* **2023**, *14*, 7996.
- [24] Y. Bai, T. Chen, X. Ji, J. Wang, W. Zhao, S. Yuan, Y. Zhang, G. Long, Z. Zhang, X. Wan, B. Kan, Y. Chen, *Adv. Energy Mater.* **2024**, 2400938.
- [25] B. Chang, Y. Zhang, C. Zhang, M. Zhang, Q. Wang, Z. Xu, Q. Chen, Y. Bai, H. Fu, S. Meng, L. Xue, S. Kim, C. Yang, Y. Yi, Z. G. Zhang, *Angew. Chem. Int. Ed. Engl.* **2024**, *63*, e202400590.
- [26] Y. Ding, W. A. Memon, D. Zhang, Y. Zhu, S. Xiong, Z. Wang, J. Liu, H. Li, H. Lai, M. Shao, F. He, *Angew. Chem. Int. Ed. Engl.* **2024**, *63*, e202403139.
- [27] J. W. Lee, C. Sun, J. Lee, D. J. Kim, W. J. Kang, S. Lee, D. Kim, J. Park, T. N. L. Phan, Z. Tan, F. S. Kim, J. Y. Lee, X. Bao, T. S. Kim, Y. H. Kim, B. J. Kim, *Adv. Energy Mater.* **2024**, *14*, 2303872.
- [28] X. Liu, Z. Zhang, C. Wang, C. Zhang, S. Liang, H. Fang, B. Wang, Z. Tang, C. Xiao, W. Li, *Angew. Chem. Int. Ed. Engl.* **2024**, *63*, e202316039.
- [29] M. Lv, Q. Wang, J. Zhang, Y. Wang, Z. G. Zhang, T. Wang, H. Zhang, K. Lu, Z. Wei, D. Deng, *Adv. Mater.* **2024**, *36*, 2310046.
- [30] J. Peng, F. Meng, J. Cheng, X. Lai, M. Du, M. Huang, J. Zhang, F. He, E. Zhou, D. Zhao, B. Zhao, *ACS Appl. Mater.* **2024**, *16*, 7317-7326.
- [31] F. Yi, M. Xiao, Y. Meng, H. Bai, W. Su, W. Gao, Z. F. Yao, G. Qi, Z. Liang, C. Jin, L. Tang, R. Zhang, L. Yan, Y. Liu, W. Zhu, W. Ma, Q. Fan, *Angew. Chem. Int. Ed. Engl.* **2024**, *63*, e202319295.
- [32] C. Zhang, J. Song, L. Ye, X. Li, M. H. Jee, H. Y. Woo, Y. Sun, *Angew. Chem. Int. Ed. Engl.* **2024**, *63*, e202316295.
- [33] M. Zhang, B. Chang, R. Zhang, S. Li, X. Liu, L. Zeng, Q. Chen, L. Wang, L. Yang, H. Wang, J. Liu, F. Gao, Z. G. Zhang, *Adv. Mater.* **2024**, *36*, 2308606.

- [34] J. W. Lee, C. Sun, H. Jeon, T. H. Q. Nguyen, T. N. L. Phan, X. Bao, Y. H. Kim, B. J. Kim, *Adv. Funct. Mater.* **2024**, 2404569.
